# Supplementary material
Source: PubMed Central journal article supplement (PMC3632080)
Supplement: NIHMS448527-supplement-Supplement1.pdf [file NIHMS448527-supplement-Supplement1.pdf]

## Supplementary Appendix

This appendix has been provided by the authors to give readers additional information about their work.

Supplement to: Thun MJ, Carter BD, Feskanich D, et al. 50-Year trends in smoking-related mortality in the United States. *N Engl J Med* 2013;368:351-64. DOI: 10.1056/NEJMsa1211127

## Supplementary Materials

|                                                                                                                                                                                                                                                                                                               | <b>Page</b> |
|---------------------------------------------------------------------------------------------------------------------------------------------------------------------------------------------------------------------------------------------------------------------------------------------------------------|-------------|
| <b>Supplementary Online Text.</b> Narrative Description of the Cohorts                                                                                                                                                                                                                                        | 1           |
| <b>Figure S1.</b> Age-specific death rates (per 100,000) for lung cancer and COPD for male and female smokers in CPS-I 1959-1965, CPS-II 1982-1988, and the 2000-2010 pooled analyses, by 5-year birth cohort and attained age.                                                                               | 7           |
| <b>Table S1.</b> Baseline characteristics of the contemporary cohorts.                                                                                                                                                                                                                                        | 8           |
| <b>Table S2.</b> Pooled age-specific mortality rates per 100,000 and relative risks (RR) in never and current smokers for lung cancer, COPD, ischemic heart disease, other heart disease, total stroke, and all causes for men and women of CPS-II Nutrition Cohort, HPFS, NHS, NIH-AARP, and WHI, 2000-2010. | 9           |
| <b>Table S3.</b> Relative risks of mortality in current vs. never smokers by cigarettes per day and years smoked: men and women of the contemporary cohorts.                                                                                                                                                  | 10          |
| <b>Table S4.</b> Relative risks of mortality in current vs. never smokers by cigarettes per day and years smoked: men and women in CPS-II Mortality Cohort.                                                                                                                                                   | 11          |
| <b>Table S5.</b> Relative risks of mortality in current vs. never smokers by cigarettes per day and years smoked: men and women of CPS-I.                                                                                                                                                                     | 12          |
| <b>Table S6.</b> Relative risks of mortality in former smokers compared to both never and current smokers by age at cessation: men and women in the contemporary cohorts.                                                                                                                                     | 13          |
| <b>Table S7.</b> Relative risks of mortality in former smokers compared to both never and current smokers by age at cessation: men and women in the CPS-II Mortality Cohort.                                                                                                                                  | 14          |
| <b>Table S8.</b> Relative risks of mortality in former smokers compared to both never and current smokers by age at cessation: men and women in the CPS-I.                                                                                                                                                    | 15          |
| <b>Table S9.</b> Relative risks of mortality in former smokers compared to both never and current smokers by years since cessation.                                                                                                                                                                           | 16          |
| <b>Table S10.</b> Relative risks of mortality in former smokers compared to both never and current smokers by years since cessation: women in the contemporary cohorts.                                                                                                                                       | 17          |
| <b>Table S11.</b> Relative risks of mortality in former smokers compared to both never and current smokers by years since cessation: men in the CPS-II Mortality Cohort.                                                                                                                                      | 18          |
| <b>Table S12.</b> Relative risks of mortality in former smokers compared to both never and current smokers by years since cessation: women in the CPS-II Mortality Cohort.                                                                                                                                    | 19          |
| <b>Table S13.</b> Relative risks of mortality in former smokers compared to both never and current smokers by years since cessation: men and women in CPS-I                                                                                                                                                   | 20          |
| <b>Table S14.</b> Pooled interaction models of the relative risk of mortality associated with current and former smoking compared to never smoking by education attainment in women and men in the CPS-II Nutrition Cohort, HPFS, NHS, NIH-AARP, and WHI.                                                     | 21          |
| <b>Table S15.</b> Age-standardized rates per 100,000, and age-adjusted Cox Proportional Hazard Ratios for women of CPS-II Nutrition Cohort using time dependent, baseline only, or smoking status ~2-years prior to endpoint.                                                                                 | 22          |
| <b>Table S16.</b> Age-standardized rates per 100,000, and age-adjusted Cox Proportional Hazard Ratios for men of CPS-II Nutrition Cohort using time dependent, baseline only, or smoking status ~2-years prior to endpoint.                                                                                   | 23          |

## *Supplementary narrative description of cohorts*

### *Historical cohorts*

***Cancer Prevention Studies I (CPS-I) and II (CPS-II)*** have been used previously to measure the mortality risks associated with cigarette smoking in the 1960s and 1980s respectively.<sup>1 3,18,19</sup> CPS-I was initiated by the American Cancer Society (ACS) in the fall of 1959, when 68,000 ACS volunteers recruited approximately one million subjects in 25 states to complete a four page questionnaire. Enrollment was by household; volunteers were instructed to recruit all household members 30 years of age or older if at least one family member was 45 years or older. The enrollment excluded people in military service, institutions and itinerants who would likely be difficult to trace<sup>20</sup>. A total of 1,051,042 individuals (456,491 men, 594,551 women) representing approximately 3% of the U.S. population age 45 and over<sup>1</sup> completed and mailed to ACS a four page questionnaire with information on smoking, medical and demographic characteristics. After exclusion of 149,828 men who reported ever smoking pipes or cigars, 23,965 subjects whose baseline smoking status was unspecified, and 336,267 men and women whose attained age was  $\leq 55$ , a total of 515,982 subjects (183,060 men and 335,922 women) were retained in the CPS-I analyses (Table 1).

CPS-II enrollment began in the fall of 1982, when 77,000 ACS volunteers recruited nearly 1.2 million participants using the same approach as in CPS-I but expanding coverage to all 50 states, the District of Columbia, Puerto Rico and Guam. A total of 1,184,418 individuals (508,237 men, 676,181 women) completed and mailed to ACS a four page questionnaire with information on smoking, medical and demographic characteristics. After exclusion of 101,572 men who reported ever smoking pipes or cigars, 71,063 subjects whose baseline smoking status was unspecified, and 265,298 men and women whose attained age was  $\leq 55$ , a total of 746,485 (293,592 men, 452,893 women) were retained in the CPS-II analyses (Table 1).

Follow-up was restricted to the first six years after enrollment when the follow-up methods were identical in CPS-I (1959-1965) and CPS-II (1982-88). Vital status was determined through personal contact by the volunteers who enrolled subjects. Persons lost to follow-up were considered alive until the last date of follow-up. Death certificates were obtained for deceased subjects. Underlying cause of death was coded according to an abbreviated version of the Manual of the International Statistical Classification of Diseases, Injuries, and Causes of Death, seventh (ICD-7)[World Health Organization 1957] in CPS-I and ninth revision (ICD-9)[World Health Organization 1977] in CPS-II.

The definition of ever smoking varied slightly in CPS-I (and in the enrollment questionnaire of the NHS- see below) from that in cohorts initiated later. CPS-I defined current smoking at baseline by asking “Do you now smoke?” and former smoking by asking “If you do not smoke cigarettes now, did you ever smoke cigarettes regularly (regularly not defined)?” CPS-II (1982) defined regular smoking by the criterion used in the British Doctors’ Study<sup>31</sup> of at least “one a day for one year’s time”. No updated information on smoking was obtained in CPS-II. Although updated information on smoking was obtained in CPS-I (annually for the first six years of follow-up and twice thereafter) only the baseline information on smoking was used in the main analyses. Sensitivity analyses were conducted to assess how using the updated information on smoking would influence the results.

### *Description of contemporary cohorts*

The **NIH-AARP Diet and Health cohort (NIH-AARP)** is the largest of the five contemporary cohorts in our analysis. It was established in 1995/1996 when 567,000 AARP members, ages 50 to 71 years, returned questionnaire responses about their demographic, medical and behavioral characteristics<sup>11,32</sup>. Enrollment was restricted to six U.S. states and two metropolitan areas with high quality cancer registries. After exclusion of 21,799 participants (13,601 men, 8,198 women) with indeterminate smoking status at

baseline and 19,451 subjects (13,520 men, 5,931 women) who died or were censored before January, 2000, a total of 525,149 subjects (312,546 men, 212,603 women remained in the analysis (Table S1).

The vital status of NIH-AARP participants was determined from enrollment through 31 December 2008 through annual linkage to the Social Security Administration Death Master File<sup>33</sup>. Persons identified as deceased were further linked to the National Death Index Plus to obtain information on the underlying cause of death. Person-years at risk accumulated from January 1, 2000 until death or the end of follow-up, whichever came first.

Information on smoking status and the number of cigarettes smoked per day was collected at enrollment (1995/1996)<sup>27</sup> and again in 2004-2006. Ever smoking was defined as having smoked “100 or more cigarettes during your entire life”. Both questionnaires asked, “Do you currently smoke cigarettes?” Categorical information was collected on the number of cigarettes smoked per day at various ages. The information collected in 1995/96 was used to define exposure from the beginning of follow-up in our study (1 Jan 2000) to the return of the 2004-2006 questionnaire, whereupon smoking was reclassified by status, number of cigarettes smoked and duration among current smokers, and by time since quitting among former smokers<sup>26</sup>. The NIH-AARP Diet and Health study was reviewed and approved by the Special Studies Institutional Review Board of the U.S. National Cancer Institute (NCI).

The **CPS-II Nutrition Cohort** was established by the American Cancer Society in 1992/93 as a subset of the original (1982) CPS-II mortality study<sup>12</sup>. Questionnaires were mailed to CPS-II participants between the ages of 50-74 years in 1992 who lived in 21 states with high quality population-based cancer registries. A total of 184,187 individuals (86,404 men and 97,785 women) completed a ten page questionnaire on smoking, diet, medical and demographic characteristics. Follow-up questionnaires were mailed biennially to surviving cohort members beginning in 1997. A  $\geq 90\%$  response rate has been achieved for each follow-up questionnaire. Our analyses are based on 165,742 subjects (75,162 men and 90,580 women) who

completed the 1999 questionnaire. We excluded 2,483 subjects (856 men, 1627 women) whose smoking status was undefined and 15,962 (10,384 men, 5,578 women) who died before January 1, 2000. The vital status of cohort members was determined through 31 December 2008 through linkage with the National Death Index. For deceased persons the underlying cause of death was obtained from NDI Plus. Person-years at risk accumulated from January 1, 2000 until death or the end of follow-up, whichever came first.

The CPS-II Nutrition Cohort used the same criterion for “ever” smoking as the US National Health Interview (NHIS) Survey<sup>34</sup>: “Have you smoked at least one hundred cigarettes in your entire life?”<sup>34</sup> For subjects who answered “yes” to this question, current and former smoking were defined based on the follow-up question, “Do you smoke cigarettes now?” Smoking status on Jan 1, 2000 was based on responses to the 2000 questionnaire and was updated with each biennial follow-up questionnaire through 2005. The Emory University School of Medicine Institutional Review Board approved all aspects of the CPS-II Nutrition cohort.

**Nurses’ Health Study (NHS):** The Harvard NHS was established in 1976 when 121,700 female registered nurses from 11 U.S. states completed a mailed questionnaire about medical history and potential risk factors for cancer and other chronic diseases<sup>15</sup>. Deaths have been identified by family members and through linkage with the National Death Index<sup>35</sup> through at least 31 May 2010, which constituted the end of follow-up in our analyses. Information on smoking was collected at enrollment in 1976 and every two years thereafter. As in CPS-I, current and former smoking were initially defined by responses to the questions “Do you now smoke?” and “If you do not smoke cigarettes now, did you ever smoke cigarettes regularly (regularly not defined)?” Our analyses are based on 75,170 female nurses who completed the 2000 survey. We updated the information on smoking status (never, current or former), quantity of cigarettes smoked and duration among current smokers, and time since quitting among former smokers<sup>26</sup> at the start of each 2-year interval. Person-years of follow-up accumulate from January 1<sup>st</sup>, 2000 until either the date of death or the end of follow-up (May 31, 2010).

**Health Professionals Follow-up Study (HPFS):** The Harvard HPFS is the male counterpart to the NHS, begun in 1986 when 51,529 male health professionals (dentists, optometrists, pharmacists, podiatrists and veterinarians, age 40 to 75 years answered a similar mailed questionnaire<sup>16</sup>. As in the NHS, participants complete biennial follow-up questionnaires and provide information on new medical diagnoses and to update information on lifestyle factors (response rate 96%)<sup>36</sup>. Deaths have been identified by family members and through linkage with the National Death Index<sup>35</sup>. Our analyses included 33,994 men who completed the 2000 survey. Person-years of follow-up began at January 1<sup>st</sup>, 2000 and ended at death or the end of follow-up (30 December, 2009), whichever came first.

HPFS assessed current smoking status and cigarettes smoked per day every two years, beginning in 1986. The initial questionnaire also inquired about past smoking, time since quitting, and the average number of cigarettes smoked per day within seven age categories<sup>36</sup>. Ever smoking was initially defined as “twenty packs or more in your lifetime”. On each subsequent questionnaire, participants reported whether they currently smoked cigarettes. At the start of each two-year interval we reclassified smoking status (never, current or former), number of cigarettes smoked per day and duration among current smokers, and time since quitting among former smokers<sup>26</sup>. The HPFS was approved by the Institutional Review Board of the Harvard School of Public Health. Participants provide implied consent by virtue of returning their questionnaires and written informed consent for medical reviews.

**Women’s Health Initiative (WHI):** The WHI was established by the National Institutes of Health in 1991 to address the most common causes of death, disability and impaired quality of life in postmenopausal women. Components of the WHI that contributed data to our analyses were the observational study (N=93,676) and three overlapping randomized clinical trials (N=68,132). The observational study was designed to obtain detailed information on a range of lifestyle factors and medical history from postmenopausal women. The clinical trials were designed to test the effects of various nutritional and hormonal interventions on cancer, heart disease and fractures. In total, the WHI studies enrolled 161,808 women, ages 50-79 years between 1993 and 1998 at 40 clinical centers throughout the U.S. Participants

were ages 50 to 79 years at enrollment. Information on year of enrollment was provided to us within two-year time intervals out of concern for confidentiality. Information on ever smoking (at least 100 cigarettes), age at starting to smoke regularly (nine categories), current smoking (yes/no), and age at quitting (former smoker nine categories) was collected at the time of initial enrollment. This information was supplemented with a second survey administered in 2000 but not updated during subsequent follow-up. Our analyses include 156,701 women who were alive and provided updated information on smoking in 2000. Deaths were identified through 9/30/2010 for participants who, in 2005, consented to active follow-up by the WHI and through 12/31/2008 for participants followed only through NDI.



**Figure S1. Age-specific death rates (per 100,000) for lung cancer and COPD for male and female smokers in CPS-I, 1959-1965, CPS-II 1982-1988, and the 2000-2010 pooled analyses, by 5-year birth cohort and attained age.**

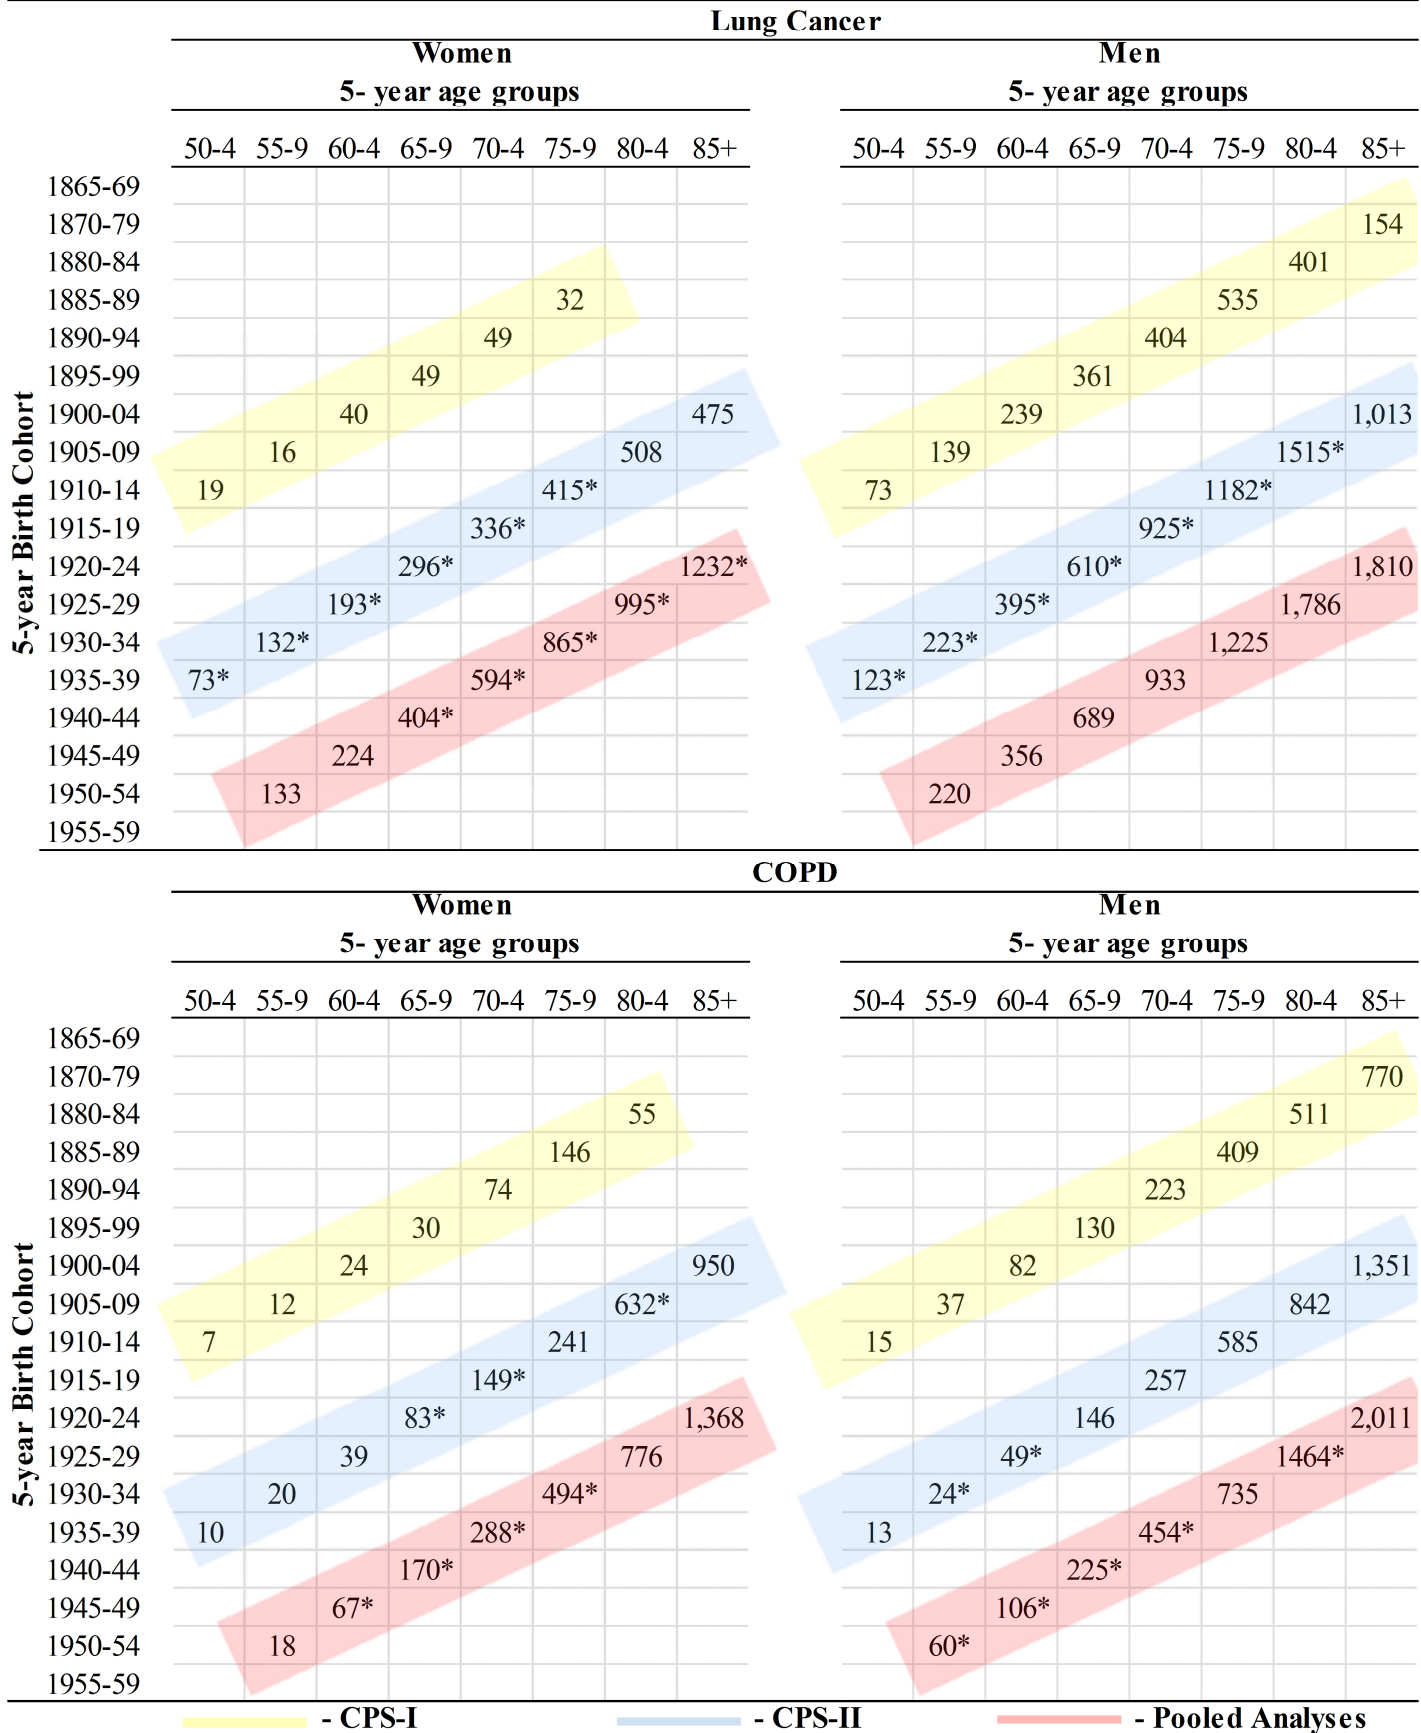

\* Age-specific death rates are statistically significantly higher than in the earlier period.

**Table S1. Baseline characteristics of the contemporary cohorts.**

|                                                   | CPS-II Nutrition Cohort |             | Harvard Cohorts |            | NIH-AARP   |             | WHI         |
|---------------------------------------------------|-------------------------|-------------|-----------------|------------|------------|-------------|-------------|
|                                                   | Men                     | Women       | HPFS            | NHS        | Men        | Women       | Women       |
| <b>Total included in analysis</b>                 | 75,162                  | 90,580      | 33,994          | 75,170     | 312,546    | 212,603     | 156,701     |
| <b>Year(s) of enrollment</b>                      | 1992                    |             | 1986            | 1976       | 1995-1996  |             | 1993-1998   |
| <b>Years of follow-up in analysis</b>             | 2000-2008               |             | 2000-2010       |            | 2000-2008  |             | 2000-2010   |
| <b>Number of Deaths</b>                           |                         |             |                 |            |            |             |             |
| <b>All Causes</b>                                 | 19,511                  | 13,458      | 5,663           | 7,555      | 48,626     | 23,112      | 18,831      |
| <b>Lung Cancer</b>                                | 1,378                   | 862         | 310             | 609        | 4,947      | 2,489       | 831         |
| <b>COPD</b>                                       | 889                     | 611         | 147             | 161        | 2,442      | 1,558       | 704         |
| <b>Ischemic Heart Disease</b>                     | 4,021                   | 1,806       | 1,231           | 505        | 9,501      | 3,022       | 2,536       |
| <b>Other Heart Disease</b>                        | 1,593                   | 1,114       | 306             | 302        | 3,362      | 1,697       | 1,528       |
| <b>Total Stroke</b>                               | 1,125                   | 1,024       | 316             | 453        | 1,990      | 1,189       | 1,439       |
| <b>Mean age (st dev) ¥</b>                        | 71.3 (5.9)              | 69.5 (6.4)  | 66.2 (9.2)      | 65.3 (7.0) | 65.7 (5.3) | 65.4 (5.4)  | 66.8 (7.1)  |
| <b>Education (%) ±</b>                            |                         |             |                 |            |            |             |             |
| High school or less                               | 26.6                    | 21.0        | -               | -          | 21.9       | 31.4        | 16.1        |
| Some college                                      | 25.6                    | 29.1        | -               | -          | 31.3       | 35.4        | 32.9        |
| College education or more                         | 47.1                    | 49.3        | 100.0           | 100.0      | 44.4       | 30.0        | 50.6        |
| <b>Race (%)</b>                                   |                         |             |                 |            |            |             |             |
| White                                             | 97.4                    | 97.3        | 94.7            | 97.5       | 92.8       | 89.8        | 83.1        |
| Black                                             | 1.2                     | 1.5         | 0.8             | 1.4        | 2.7        | 5.4         | 8.9         |
| Other/Missing                                     | 1.4                     | 1.2         | 4.6             | 1.1        | 4.5        | 4.8         | 8.1         |
| <b>Ethnicity (%)</b>                              |                         |             |                 |            |            |             |             |
| Non-Hispanic                                      | 99.3                    | 99.4        | -               | 99.1       | 97.2       | 96.8        | 96.4        |
| Hispanic                                          | 0.4                     | 0.4         | -               | 0.9        | 1.9        | 1.8         | 3.6         |
| <b>Marital Status at enrollment (%)</b>           |                         |             |                 |            |            |             |             |
| Married                                           | 94.0                    | 83.7        | 91.1            | 100.0      | 85.8       | 44.4        | 62.4        |
| <b>Smoking Status (%) † **</b>                    |                         |             |                 |            |            |             |             |
| Never                                             | 37.5                    | 53.6        | 50.3            | 46.5       | 31.1       | 45.4        | 51.5        |
| Current                                           | 7.3                     | 6.6         | 4.3             | 9.4        | 11.6       | 15.4        | 5.8         |
| Former                                            | 55.2                    | 39.8        | 45.4            | 44.1       | 57.3       | 39.2        | 42.7        |
| <b>Cigarettes smoked per day (%) ** ††</b>        |                         |             |                 |            |            |             |             |
| <10                                               | 36.2                    | 41.9        | 46.3            | 46.9       | 20.5       | 30.1        | 74.7        |
| 10-19                                             | 33.8                    | 29.9        | 31.6            | 39.2       | 37.5       | 42.3        | 17.3        |
| 20-39                                             | 17.9                    | 15.5        | 20.2            | 11.7       | 37.0       | 25.7        | 6.7         |
| 40+                                               | 1.2                     | 0.6         | 1.7             | 0.6        | 5.1        | 2.0         | 0.4         |
| <b>Mean years (st dev) of smoking by age †† ¥</b> |                         |             |                 |            |            |             |             |
| 50-59                                             | 37.1 (8.7)              | 34.8 (8.8)  | 34.7 (7.6)      | 36.7 (5.9) | 39.2 (7.1) | 37.4 (7.5)  | 32.8 (10.5) |
| 60-69                                             | 43.9 (9.2)              | 41.9 (9.6)  | 44.0 (7.8)      | 44.7 (5.9) | 45.3 (8.0) | 43.4 (8.8)  | 38.9 (11.6) |
| 70-79                                             | 50.8 (10.6)             | 47.9 (11.4) | 53.0 (9.0)      | 52.6 (6.4) | 51.3 (8.4) | 47.3 (11.4) | 44.6 (11.8) |
| 80+                                               | 56.5 (15.6)             | 52.4 (12.4) | 55.6 (15.4)     | -          | -          | -           | 45.1 (14.0) |
| <b>Age at initiation (%) ** †† ‡</b>              |                         |             |                 |            |            |             |             |
| <15                                               | 12.6                    | 8.8         | 12.6            | 3.5        | 34.3       | 17.4        | 8.4         |
| 15-19                                             | 67.8                    | 56.3        | 38.9            | 55.8       | 40.8       | 43.3        | 45.6        |
| 20-29                                             | 17.1                    | 28.3        | 41.8            | 38.0       | 22.2       | 33.9        | 36.6        |
| 30+                                               | 2.3                     | 6.5         | 4.6             | 2.1        | 2.6        | 5.4         | 9.2         |

NHS enrolled in 1976, HPFS in 1986, CPS-II Nutrition Cohort in 1992, NIH-AARP in 1995-1996, and WHI in 1993-1998

\*\* Age-adjusted to the 2000 US population standard

¥ Age at beginning of follow-up

± For women, spouse's education is used if greater

† Smoking status as of 1959 for CPS-I, 1982 for CPS-II, 1999 for CPS-II Nutrition Cohort, 2000 for HPFS and NHS, 1996 for NIH-AARP, and 1995-2001 for WHI.

†† Only in Current Smokers

‡ For NIH-AARP, Age of Initiation is only available for those who completed the 2004 survey

**Table S2. Pooled age-specific mortality rates per 100,000 and relative risks (RR) in never and current smokers for lung cancer, COPD, ischemic heart disease, other heart diseases, total stroke, and all causes for men and women of CPS-II Nutrition Cohort, HPFS, NHS, NIH-AARP, and WHI, 2000-2010.**

|                        | Lung cancer |       |      |              | COPD   |       |      |               | Ischemic Heart Disease |       |     |            | All Stroke |       |     |            | Other Heart Diseases |       |     |            | All Causes |        |     |            |
|------------------------|-------------|-------|------|--------------|--------|-------|------|---------------|------------------------|-------|-----|------------|------------|-------|-----|------------|----------------------|-------|-----|------------|------------|--------|-----|------------|
|                        | Deaths      | Rate  | RR   | 95% CI       | Deaths | Rate  | RR   | 95% CI        | Deaths                 | Rate  | RR  | 95% CI     | Deaths     | Rate  | RR  | 95% CI     | Deaths               | Rate  | RR  | 95% CI     | Deaths     | Rate   | RR  | 95% CI     |
| <b>Men</b>             |             |       |      |              |        |       |      |               |                        |       |     |            |            |       |     |            |                      |       |     |            |            |        |     |            |
| <b>Never Smokers</b>   |             |       |      |              |        |       |      |               |                        |       |     |            |            |       |     |            |                      |       |     |            |            |        |     |            |
| 55-59                  | 8           | 12    |      |              | 0      | 0     |      |               | 37                     | 54    |     |            | 6          | 9     |     |            | 8                    | 12    |     |            | 207        | 299    |     |            |
| 60-64                  | 26          | 14    |      |              | 2      | 1     |      |               | 179                    | 97    |     |            | 34         | 19    |     |            | 50                   | 27    |     |            | 975        | 530    |     |            |
| 65-69                  | 43          | 16    |      |              | 21     | 8     |      |               | 411                    | 154   |     |            | 84         | 31    |     |            | 172                  | 64    |     |            | 2,207      | 826    |     |            |
| 70-74                  | 103         | 33    |      |              | 40     | 13    |      |               | 833                    | 268   |     |            | 220        | 71    |     |            | 325                  | 104   |     |            | 4,221      | 1,356  |     |            |
| 75-79                  | 104         | 49    |      |              | 59     | 28    |      |               | 1,020                  | 479   |     |            | 299        | 141   |     |            | 372                  | 175   |     |            | 4,944      | 2,323  |     |            |
| 80-84                  | 49          | 74    |      |              | 45     | 68    |      |               | 633                    | 954   |     |            | 195        | 294   |     |            | 260                  | 392   |     |            | 2,881      | 4,340  |     |            |
| 85+                    | 24          | 125   |      |              | 16     | 83    |      |               | 469                    | 2,435 |     |            | 163        | 846   |     |            | 213                  | 1,106 |     |            | 2,027      | 10,522 |     |            |
| <b>Current Smokers</b> |             |       |      |              |        |       |      |               |                        |       |     |            |            |       |     |            |                      |       |     |            |            |        |     |            |
| 55-59                  | 51          | 220   | 19.0 | (9.0, 40.0)  | 14     | 60    |      |               | 40                     | 172   | 3.2 | (2.1, 5.0) | 4          | 17    | 2.0 | (0.6, 7.0) | 8                    | 34    | 3.0 | (1.1, 7.9) | 256        | 1,102  | 3.7 | (3.1, 4.4) |
| 60-64                  | 181         | 356   | 25.1 | (16.7, 37.9) | 54     | 106   | 97.5 | (23.8, 399.9) | 195                    | 383   | 3.9 | (3.2, 4.8) | 24         | 47    | 2.5 | (1.5, 4.3) | 50                   | 98    | 3.6 | (2.4, 5.3) | 914        | 1,795  | 3.4 | (3.1, 3.7) |
| 65-69                  | 395         | 689   | 42.8 | (31.2, 58.6) | 129    | 225   | 28.6 | (18.0, 45.4)  | 298                    | 520   | 3.4 | (2.9, 3.9) | 51         | 89    | 2.8 | (2.0, 4.0) | 97                   | 169   | 2.6 | (2.0, 3.4) | 1,652      | 2,880  | 3.5 | (3.3, 3.7) |
| 70-74                  | 493         | 933   | 28.2 | (22.8, 34.9) | 240    | 454   | 35.3 | (25.3, 49.4)  | 436                    | 825   | 3.1 | (2.7, 3.5) | 86         | 163   | 2.3 | (1.8, 3.0) | 139                  | 263   | 2.5 | (2.1, 3.1) | 2,339      | 4,424  | 3.3 | (3.1, 3.4) |
| 75-79                  | 265         | 1,225 | 25.1 | (20.0, 31.5) | 159    | 735   | 26.5 | (19.7, 35.7)  | 237                    | 1,096 | 2.3 | (2.0, 2.6) | 51         | 236   | 1.7 | (1.2, 2.3) | 81                   | 374   | 2.1 | (1.7, 2.7) | 1,315      | 6,078  | 2.6 | (2.5, 2.8) |
| 80-84                  | 61          | 1,786 | 24.2 | (16.6, 35.2) | 50     | 1,464 | 21.6 | (14.4, 32.3)  | 60                     | 1,757 | 1.8 | (1.4, 2.4) | 14         | 410   | 1.4 | (0.8, 2.4) | 21                   | 615   | 1.6 | (1.0, 2.4) | 351        | 10,278 | 2.4 | (2.1, 2.6) |
| 85+                    | 9           | 1,810 | 14.5 | (6.8, 31.2)  | 10     | 2,011 | 24.2 | (11.0, 53.3)  | 20                     | 4,021 | 1.7 | (1.1, 2.6) | 6          | 1,206 | 1.4 | (0.6, 3.2) | 7                    | 1,407 | 1.3 | (0.6, 2.7) | 93         | 18,698 | 1.8 | (1.4, 2.2) |
| <b>Women</b>           |             |       |      |              |        |       |      |               |                        |       |     |            |            |       |     |            |                      |       |     |            |            |        |     |            |
| <b>Never Smokers</b>   |             |       |      |              |        |       |      |               |                        |       |     |            |            |       |     |            |                      |       |     |            |            |        |     |            |
| 55-59                  | 7           | 6     |      |              | 0      | 0     |      |               | 24                     | 20    |     |            | 11         | 9     |     |            | 16                   | 13    |     |            | 326        | 265    |     |            |
| 60-64                  | 34          | 10    |      |              | 12     | 4     |      |               | 111                    | 32    |     |            | 34         | 10    |     |            | 93                   | 27    |     |            | 1,253      | 361    |     |            |
| 65-69                  | 77          | 15    |      |              | 22     | 4     |      |               | 303                    | 59    |     |            | 136        | 27    |     |            | 189                  | 37    |     |            | 2,948      | 577    |     |            |
| 70-74                  | 123         | 21    |      |              | 45     | 8     |      |               | 623                    | 107   |     |            | 352        | 61    |     |            | 399                  | 69    |     |            | 5,301      | 913    |     |            |
| 75-79                  | 160         | 35    |      |              | 110    | 24    |      |               | 931                    | 203   |     |            | 605        | 132   |     |            | 594                  | 129   |     |            | 7,133      | 1,552  |     |            |
| 80-84                  | 70          | 34    |      |              | 78     | 38    |      |               | 832                    | 404   |     |            | 569        | 276   |     |            | 539                  | 262   |     |            | 5,974      | 2,902  |     |            |
| 85+                    | 42          | 81    |      |              | 53     | 102   |      |               | 525                    | 1,015 |     |            | 308        | 595   |     |            | 382                  | 738   |     |            | 3,247      | 6,274  |     |            |
| <b>Current Smokers</b> |             |       |      |              |        |       |      |               |                        |       |     |            |            |       |     |            |                      |       |     |            |            |        |     |            |
| 55-59                  | 45          | 133   | 23.3 | (10.5, 51.7) | 6      | 18    | -    | -             | 22                     | 65    | 3.3 | (1.9, 5.9) | 7          | 21    | 2.3 | (0.9, 6.0) | 10                   | 30    | 2.3 | (1.0, 5.0) | 239        | 705    | 2.7 | (2.2, 3.1) |
| 60-64                  | 168         | 224   | 22.9 | (15.8, 33.0) | 50     | 67    | 19.3 | (10.3, 36.2)  | 91                     | 121   | 3.8 | (2.9, 5.0) | 28         | 37    | 3.8 | (2.3, 6.3) | 38                   | 51    | 1.9 | (1.3, 2.8) | 803        | 1,069  | 3.0 | (2.7, 3.2) |
| 65-69                  | 352         | 404   | 26.8 | (20.9, 34.3) | 148    | 170   | 39.4 | (25.2, 61.7)  | 198                    | 227   | 3.8 | (3.2, 4.6) | 61         | 70    | 2.6 | (1.9, 3.6) | 75                   | 86    | 2.3 | (1.8, 3.0) | 1,568      | 1,799  | 3.1 | (2.9, 3.3) |
| 70-74                  | 468         | 594   | 28.1 | (23.0, 34.2) | 227    | 288   | 37.2 | (27.0, 51.2)  | 300                    | 381   | 3.6 | (3.1, 4.1) | 112        | 142   | 2.3 | (1.9, 2.9) | 107                  | 136   | 2.0 | (1.6, 2.4) | 2,196      | 2,789  | 3.1 | (2.9, 3.2) |
| 75-79                  | 334         | 865   | 24.9 | (20.6, 30.0) | 191    | 495   | 20.7 | (16.4, 26.1)  | 188                    | 487   | 2.4 | (2.1, 2.8) | 89         | 231   | 1.8 | (1.4, 2.2) | 86                   | 223   | 1.7 | (1.4, 2.2) | 1,590      | 4,119  | 2.7 | (2.5, 2.8) |
| 80-84                  | 100         | 995   | 29.3 | (21.6, 39.7) | 78     | 776   | 20.5 | (15.0, 28.0)  | 87                     | 866   | 2.1 | (1.7, 2.7) | 41         | 408   | 1.5 | (1.1, 2.0) | 43                   | 428   | 1.6 | (1.2, 2.2) | 666        | 6,629  | 2.3 | (2.1, 2.5) |
| 85+                    | 18          | 1,232 | 15.2 | (8.7, 26.4)  | 20     | 1,368 | 13.4 | (8.0, 22.3)   | 21                     | 1,437 | 1.4 | (0.9, 2.2) | 20         | 1,368 | 2.3 | (1.5, 3.6) | 15                   | 1,026 | 1.4 | (0.8, 2.3) | 178        | 12,178 | 1.9 | (1.7, 2.3) |

**Table S3. Relative risks\* of mortality in current vs. never smokers by cigarettes per day and years smoked: men and women in contemporary cohorts†.**

|                           | All Causes |              | Lung Cancer |                | COPD   |                | Total Stroke |               | Ischemic Heart Disease |              | Other Heart Diseases |              |
|---------------------------|------------|--------------|-------------|----------------|--------|----------------|--------------|---------------|------------------------|--------------|----------------------|--------------|
|                           | RR         | (95% CI)     | RR          | (95% CI)       | RR     | (95% CI)       | RR           | (95% CI)      | RR                     | (95% CI)     | RR                   | (95% CI)     |
| <b>Men</b>                |            |              |             |                |        |                |              |               |                        |              |                      |              |
| <b>Cigarettes per Day</b> |            |              |             |                |        |                |              |               |                        |              |                      |              |
| <10                       | 2.21       | (2.09, 2.33) | 15.83       | (13.45, 18.65) | 19.70  | (15.79, 24.58) | 1.54         | (1.18, 2.02)  | 1.99                   | (1.76, 2.25) | 2.10                 | (1.73, 2.55) |
| 10-19                     | 2.60       | (2.48, 2.71) | 23.61       | (20.58, 27.09) | 22.59  | (18.49, 27.61) | 1.85         | (1.47, 2.33)  | 2.45                   | (2.22, 2.70) | 1.72                 | (1.42, 2.08) |
| 20-39                     | 3.33       | (3.19, 3.48) | 32.42       | (28.33, 37.11) | 32.29  | (26.51, 39.32) | 2.08         | (1.62, 2.66)  | 2.73                   | (2.47, 3.03) | 2.72                 | (2.29, 3.23) |
| 40+                       | 4.08       | (3.68, 4.52) | 41.72       | (33.18, 52.46) | 33.40  | (22.77, 49.00) | 2.88         | (1.63, 5.10)  | 3.62                   | (2.85, 4.59) | 2.34                 | (1.43, 3.84) |
| <i>P trend</i>            | <.0001     |              | <.0001      |                | <.0001 |                | 0.0885       |               | <.0001                 |              | 0.0279               |              |
| <b>Duration (years)†</b>  |            |              |             |                |        |                |              |               |                        |              |                      |              |
| <30                       | 1.49       | (1.18, 1.86) | 3.17        | (1.01, 9.99)   | 5.04   | (1.23, 20.66)  | 1.48         | (0.61, 3.63)  | 1.59                   | (0.98, 2.57) | 1.73                 | (0.81, 3.66) |
| 30-39                     | 2.69       | (2.19, 3.29) | 9.58        | (4.66, 19.69)  | 15.86  | (6.21, 40.51)  | 2.10         | (0.78, 5.67)  | 2.81                   | (1.80, 4.37) | 2.89                 | (1.37, 6.12) |
| 40-49                     | 2.67       | (2.36, 3.01) | 20.06       | (14.40, 27.94) | 29.46  | (18.17, 47.76) | 2.03         | (1.13, 3.65)  | 2.68                   | (2.05, 3.49) | 2.36                 | (1.45, 3.84) |
| 50+                       | 2.64       | (2.45, 2.84) | 29.40       | (23.29, 37.12) | 35.07  | (25.44, 48.34) | 1.76         | (1.24, 2.50)  | 1.99                   | (1.66, 2.38) | 1.81                 | (1.32, 2.48) |
| <i>P trend</i>            | <.0001     |              | <.0001      |                | <.0001 |                | 0.2037       |               | 0.7719                 |              | 0.9748               |              |
| <b>Women</b>              |            |              |             |                |        |                |              |               |                        |              |                      |              |
| <b>Cigarettes per Day</b> |            |              |             |                |        |                |              |               |                        |              |                      |              |
| <10                       | 2.27       | (2.19, 2.36) | 16.69       | (14.68, 18.98) | 19.30  | (16.40, 22.71) | 1.79         | (1.52, 2.11)  | 2.47                   | (2.22, 2.75) | 1.91                 | (1.65, 2.22) |
| 10-19                     | 2.69       | (2.58, 2.80) | 24.19       | (21.38, 27.37) | 19.81  | (16.66, 23.57) | 2.14         | (1.77, 2.59)  | 3.04                   | (2.70, 3.42) | 1.56                 | (1.28, 1.91) |
| 20-39                     | 3.48       | (3.30, 3.67) | 36.13       | (31.58, 41.33) | 30.93  | (25.63, 37.32) | 2.25         | (1.71, 2.95)  | 3.42                   | (2.93, 3.99) | 2.03                 | (1.58, 2.61) |
| 40+                       | 4.41       | (3.70, 5.25) | 59.46       | (43.62, 81.05) | 39.99  | (24.16, 66.21) | 6.13         | (3.29, 11.42) | 2.88                   | (1.55, 5.36) | 1.37                 | (0.44, 4.27) |
| <i>P trend</i>            | <.0001     |              | <.0001      |                | <.0001 |                | 0.0047       |               | 0.0031                 |              | 0.6594               |              |
| <b>Duration (years)†</b>  |            |              |             |                |        |                |              |               |                        |              |                      |              |
| <30                       | 1.81       | (1.61, 2.03) | 9.64        | (6.47, 14.35)  | 9.85   | (5.89, 16.46)  | 2.25         | (1.52, 3.33)  | 2.00                   | (1.45, 2.75) | 1.97                 | (1.32, 2.93) |
| 30-39                     | 2.46       | (2.25, 2.69) | 18.26       | (13.98, 23.83) | 17.40  | (11.94, 25.36) | 2.08         | (1.40, 3.07)  | 2.82                   | (2.18, 3.64) | 2.18                 | (1.52, 3.12) |
| 40-49                     | 2.87       | (2.70, 3.05) | 26.58       | (22.23, 31.78) | 28.52  | (22.50, 36.16) | 2.01         | (1.53, 2.66)  | 2.66                   | (2.20, 3.21) | 2.27                 | (1.75, 2.95) |
| 50+                       | 2.77       | (2.62, 2.92) | 28.73       | (24.21, 34.09) | 27.48  | (22.02, 34.30) | 2.32         | (1.89, 2.85)  | 2.59                   | (2.19, 3.05) | 1.91                 | (1.50, 2.42) |
| <i>P trend</i>            | <.0001     |              | <.0001      |                | <.0001 |                | 0.5893       |               | 0.0388                 |              | 0.1754               |              |

\* Based on multivariable models of pooled data adjusting for exact age, race, education, and cohort.

† For men this included NIH-AARP, CPS-II Nutrition Cohort and HPFS for cigarettes per day, and CPS-II Nutrition Cohort and HPFS for duration; for women this included NIH-AARP, CPS-II Nutrition Cohort, NHS, and WHI for cigarettes per day, and CPS-II Nutrition Cohort, NHS, and WHI for duration.

**Table S4. Relative risks\* of mortality in current vs. never smokers by cigarettes per day and years smoked: men and women in CPS-II Mortality Cohort.**

|                           | All Causes |              | Lung Cancer |                | COPD   |                | Total Stroke |              | Ischemic Heart Disease |              | Other Heart Diseases |              |
|---------------------------|------------|--------------|-------------|----------------|--------|----------------|--------------|--------------|------------------------|--------------|----------------------|--------------|
|                           | RR         | (95% CI)     | RR          | (95% CI)       | RR     | (95% CI)       | RR           | (95% CI)     | RR                     | (95% CI)     | RR                   | (95% CI)     |
| <b>Men</b>                |            |              |             |                |        |                |              |              |                        |              |                      |              |
| <b>Cigarettes per Day</b> |            |              |             |                |        |                |              |              |                        |              |                      |              |
| <10                       | 1.91       | (1.79, 2.03) | 13.88       | (10.81, 17.83) | 7.54   | (5.28, 10.77)  | 2.01         | (1.57, 2.57) | 1.55                   | (1.37, 1.76) | 1.74                 | (1.42, 2.13) |
| 10-19                     | 2.05       | (1.94, 2.16) | 15.64       | (12.54, 19.50) | 8.62   | (6.37, 11.67)  | 1.72         | (1.38, 2.16) | 1.66                   | (1.50, 1.83) | 1.55                 | (1.29, 1.85) |
| 20-39                     | 2.42       | (2.34, 2.51) | 25.45       | (21.10, 30.69) | 10.56  | (8.29, 13.45)  | 2.04         | (1.75, 2.38) | 1.87                   | (1.75, 2.00) | 2.00                 | (1.78, 2.24) |
| 40+                       | 2.79       | (2.66, 2.93) | 37.34       | (30.61, 45.55) | 12.77  | (9.47, 17.23)  | 2.09         | (1.63, 2.67) | 1.80                   | (1.62, 1.99) | 2.13                 | (1.80, 2.53) |
| <b>P trend</b>            | <.0001     |              | <.0001      |                | 0.0017 |                | 0.9990       |              | 0.1888                 |              | 0.0566               |              |
| <b>Duration (years)</b>   |            |              |             |                |        |                |              |              |                        |              |                      |              |
| <30                       | 1.60       | (1.36, 1.89) | 7.13        | (4.01, 12.68)  | 2.51   | (0.61, 10.21)  | 3.22         | (1.84, 5.63) | 1.73                   | (1.30, 2.30) | 1.21                 | (0.66, 2.20) |
| 30-39                     | 2.11       | (2.00, 2.24) | 17.01       | (13.65, 21.18) | 4.23   | (2.74, 6.52)   | 2.16         | (1.62, 2.89) | 1.79                   | (1.61, 1.99) | 1.98                 | (1.64, 2.38) |
| 40-49                     | 2.40       | (2.31, 2.50) | 22.89       | (18.88, 27.75) | 9.01   | (6.91, 11.76)  | 2.27         | (1.89, 2.73) | 1.82                   | (1.69, 1.96) | 1.92                 | (1.68, 2.19) |
| 50+                       | 2.33       | (2.24, 2.43) | 27.78       | (22.83, 33.80) | 11.57  | (9.08, 14.75)  | 1.74         | (1.48, 2.04) | 1.73                   | (1.60, 1.86) | 1.79                 | (1.57, 2.04) |
| <b>P trend</b>            | <.0001     |              | <.0001      |                | <.0001 |                | 0.5042       |              | 0.0001                 |              | 0.0002               |              |
| <b>Women</b>              |            |              |             |                |        |                |              |              |                        |              |                      |              |
| <b>Cigarettes per Day</b> |            |              |             |                |        |                |              |              |                        |              |                      |              |
| <10                       | 1.47       | (1.37, 1.57) | 4.40        | (3.33, 5.81)   | 5.86   | (4.08, 8.43)   | 1.29         | (0.98, 1.70) | 1.47                   | (1.26, 1.71) | 1.65                 | (1.34, 2.02) |
| 10-19                     | 1.87       | (1.77, 1.97) | 8.91        | (7.43, 10.68)  | 7.13   | (5.35, 9.50)   | 2.11         | (1.74, 2.56) | 1.95                   | (1.74, 2.18) | 1.76                 | (1.48, 2.09) |
| 20-39                     | 2.36       | (2.28, 2.45) | 16.63       | (14.49, 19.08) | 12.93  | (10.49, 15.95) | 2.70         | (2.33, 3.12) | 2.29                   | (2.10, 2.50) | 2.03                 | (1.77, 2.32) |
| 40+                       | 2.92       | (2.71, 3.15) | 23.15       | (19.02, 28.16) | 17.41  | (12.34, 24.56) | 2.57         | (1.83, 3.63) | 2.42                   | (1.99, 2.94) | 2.67                 | (2.03, 3.49) |
| <b>P trend</b>            | <.0001     |              | <.0001      |                | <.0001 |                | 0.0002       |              | <.0001                 |              | 0.0067               |              |
| <b>Duration (years)</b>   |            |              |             |                |        |                |              |              |                        |              |                      |              |
| <30                       | 1.52       | (1.38, 1.67) | 3.58        | (2.47, 5.19)   | 2.18   | (1.02, 4.66)   | 2.08         | (1.48, 2.94) | 1.77                   | (1.44, 2.18) | 1.31                 | (0.93, 1.85) |
| 30-39                     | 2.07       | (1.97, 2.17) | 11.67       | (9.90, 13.76)  | 7.51   | (5.58, 10.10)  | 2.58         | (2.10, 3.16) | 2.27                   | (2.01, 2.56) | 1.85                 | (1.54, 2.23) |
| 40-49                     | 2.20       | (2.11, 2.29) | 14.50       | (12.52, 16.79) | 9.07   | (7.18, 11.45)  | 2.29         | (1.94, 2.71) | 2.06                   | (1.88, 2.27) | 2.19                 | (1.91, 2.53) |
| 50+                       | 2.12       | (2.02, 2.24) | 14.44       | (12.03, 17.33) | 15.52  | (12.40, 19.42) | 1.89         | (1.58, 2.27) | 1.87                   | (1.68, 2.08) | 1.69                 | (1.43, 2.01) |
| <b>P trend</b>            | <.0001     |              | <.0001      |                | <.0001 |                | 0.4769       |              | 0.0209                 |              | 0.0010               |              |

\* Multivariable models adjust for race, education

**Table S5. Relative risks\* of mortality in current vs. never smokers by cigarettes per day and years smoked: men and women in CPS-I.**

|                           | All Causes |              | Lung Cancer |                | COPD   |               | Total Stroke |              | Ischemic Heart Disease |              | Other Heart Diseases |              |
|---------------------------|------------|--------------|-------------|----------------|--------|---------------|--------------|--------------|------------------------|--------------|----------------------|--------------|
|                           | RR         | (95% CI)     | RR          | (95% CI)       | RR     | (95% CI)      | RR           | (95% CI)     | RR                     | (95% CI)     | RR                   | (95% CI)     |
| <b>Men</b>                |            |              |             |                |        |               |              |              |                        |              |                      |              |
| <b>Cigarettes per Day</b> |            |              |             |                |        |               |              |              |                        |              |                      |              |
| <10                       | 1.38       | (1.30, 1.47) | 3.86        | (2.56, 5.83)   | 4.83   | (3.32, 7.02)  | 1.22         | (1.02, 1.47) | 1.34                   | (1.22, 1.48) | 1.40                 | (1.12, 1.75) |
| 10-19                     | 1.70       | (1.62, 1.78) | 8.93        | (6.69, 11.90)  | 5.21   | (3.79, 7.16)  | 1.32         | (1.13, 1.54) | 1.70                   | (1.59, 1.83) | 1.55                 | (1.29, 1.85) |
| 20-39                     | 1.83       | (1.77, 1.90) | 14.81       | (11.53, 19.02) | 5.70   | (4.35, 7.47)  | 1.45         | (1.29, 1.63) | 1.73                   | (1.64, 1.83) | 1.51                 | (1.31, 1.74) |
| 40+                       | 2.24       | (2.11, 2.39) | 22.16       | (16.55, 29.67) | 6.80   | (4.51, 10.25) | 1.55         | (1.21, 1.99) | 2.05                   | (1.86, 2.25) | 1.50                 | (1.12, 2.02) |
| <i>P trend</i>            | <.0001     |              | <.0001      |                | 0.1572 |               | 0.2796       |              | <.0001                 |              | 0.793                |              |
| <b>Duration (years)</b>   |            |              |             |                |        |               |              |              |                        |              |                      |              |
| <30                       | 1.28       | (1.17, 1.40) | 3.81        | (2.38, 6.10)   | 1.20   | (0.48, 2.99)  | 1.25         | (0.93, 1.68) | 1.34                   | (1.18, 1.53) | 1.47                 | (1.06, 2.02) |
| 30-39                     | 1.72       | (1.64, 1.81) | 8.15        | (6.16, 10.80)  | 4.72   | (3.35, 6.65)  | 1.49         | (1.25, 1.78) | 1.84                   | (1.71, 1.97) | 1.33                 | (1.09, 1.63) |
| 40-49                     | 1.85       | (1.78, 1.93) | 13.19       | (10.19, 17.09) | 5.50   | (4.12, 7.34)  | 1.46         | (1.27, 1.67) | 1.74                   | (1.64, 1.85) | 1.40                 | (1.18, 1.66) |
| 50+                       | 1.78       | (1.69, 1.86) | 17.82       | (13.33, 23.81) | 7.02   | (5.17, 9.53)  | 1.24         | (1.07, 1.44) | 1.61                   | (1.49, 1.74) | 1.67                 | (1.40, 2.00) |
| <i>P trend</i>            | <.0001     |              | <.0001      |                | <.0001 |               | 0.5960       |              | <.0001                 |              | 0.0881               |              |
| <b>Women</b>              |            |              |             |                |        |               |              |              |                        |              |                      |              |
| <b>Cigarettes per Day</b> |            |              |             |                |        |               |              |              |                        |              |                      |              |
| <10                       | 1.04       | (0.97, 1.12) | 1.11        | (0.58, 2.10)   | 2.14   | (1.18, 3.88)  | 1.01         | (0.83, 1.24) | 1.04                   | (0.91, 1.18) | 1.09                 | (0.87, 1.36) |
| 10-19                     | 1.40       | (1.32, 1.50) | 2.34        | (1.48, 3.71)   | 4.15   | (2.58, 6.66)  | 1.70         | (1.42, 2.02) | 1.72                   | (1.54, 1.93) | 1.27                 | (1.02, 1.59) |
| 20-39                     | 1.59       | (1.50, 1.69) | 4.49        | (3.18, 6.35)   | 5.44   | (3.56, 8.30)  | 1.98         | (1.68, 2.34) | 1.97                   | (1.78, 2.19) | 1.22                 | (0.97, 1.53) |
| 40+                       | 1.91       | (1.57, 2.32) | 5.54        | (2.04, 15.02)  | 10.57  | (3.86, 28.95) | 1.41         | (0.67, 2.97) | 2.46                   | (1.74, 3.49) | 1.63                 | (0.77, 3.42) |
| <i>P trend</i>            | <.0001     |              | <.0001      |                | 0.003  |               | 0.0001       |              | <.0001                 |              | 0.3473               |              |
| <b>Duration (years)</b>   |            |              |             |                |        |               |              |              |                        |              |                      |              |
| <30                       | 1.26       | (1.20, 1.34) | 2.15        | (1.45, 3.20)   | 2.53   | (1.57, 4.08)  | 1.43         | (1.22, 1.69) | 1.61                   | (1.46, 1.77) | 1.06                 | (0.87, 1.30) |
| 30-39                     | 1.44       | (1.35, 1.52) | 3.40        | (2.34, 4.93)   | 4.68   | (3.06, 7.17)  | 1.67         | (1.41, 1.97) | 1.58                   | (1.42, 1.77) | 1.42                 | (1.16, 1.73) |
| 40-49                     | 1.45       | (1.30, 1.61) | 4.53        | (2.45, 8.37)   | 8.36   | (4.70, 14.86) | 1.48         | (1.10, 1.98) | 1.42                   | (1.17, 1.73) | 0.92                 | (0.60, 1.42) |
| 50+                       | 1.46       | (1.19, 1.79) | -           | -              | 2.38   | (0.33, 17.11) | 1.09         | (0.60, 1.97) | 1.75                   | (1.27, 2.42) | 2.12                 | (1.28, 3.53) |
| <i>P trend</i>            | <.0001     |              | 0.0021      |                | 0.0005 |               | 0.0053       |              | 0.0158                 |              | 0.0011               |              |

\* Multivariable models adjust for race, education

**Table S6. Relative risks\* of mortality in former† smokers compared to both never and current smokers by age at cessation: men and women in the contemporary cohorts‡**

|                                      | All Causes |              | Lung Cancer |                | COPD   |                | Total Stroke |              | Ischemic Heart Disease |              | Other Heart Diseases |              |
|--------------------------------------|------------|--------------|-------------|----------------|--------|----------------|--------------|--------------|------------------------|--------------|----------------------|--------------|
|                                      | RR         | (95% CI)     | RR          | (95% CI)       | RR     | (95% CI)       | RR           | (95% CI)     | RR                     | (95% CI)     | RR                   | (95% CI)     |
| <b>Men</b>                           |            |              |             |                |        |                |              |              |                        |              |                      |              |
| <b>Age quit (vs never smokers)</b>   |            |              |             |                |        |                |              |              |                        |              |                      |              |
| <40                                  | 1.05       | (1.01, 1.10) | 2.35        | (1.87, 2.95)   | 2.04   | (1.47, 2.85)   | 0.94         | (0.80, 1.10) | 0.99                   | (0.91, 1.08) | 1.02                 | (0.89, 1.17) |
| 40-49                                | 1.28       | (1.23, 1.33) | 4.70        | (3.79, 5.84)   | 3.88   | (2.84, 5.29)   | 1.16         | (0.99, 1.37) | 1.28                   | (1.17, 1.39) | 1.16                 | (1.00, 1.34) |
| 50-59                                | 1.58       | (1.53, 1.65) | 8.74        | (7.13, 10.72)  | 9.52   | (7.19, 12.60)  | 1.12         | (0.95, 1.31) | 1.57                   | (1.44, 1.70) | 1.38                 | (1.20, 1.58) |
| 60-69                                | 1.92       | (1.84, 2.01) | 15.27       | (12.41, 18.79) | 21.84  | (16.59, 28.77) | 1.31         | (1.08, 1.59) | 1.65                   | (1.50, 1.82) | 1.42                 | (1.20, 1.67) |
| 70+                                  | 2.14       | (1.99, 2.29) | 19.44       | (14.97, 25.25) | 31.17  | (22.98, 42.28) | 1.18         | (0.85, 1.63) | 1.88                   | (1.61, 2.18) | 1.69                 | (1.32, 2.16) |
| <b>P trend</b>                       | <.0001     |              | <.0001      |                | <.0001 |                | 0.0036       |              | <.0001                 |              | <.0001               |              |
| <b>Age quit (vs current smokers)</b> |            |              |             |                |        |                |              |              |                        |              |                      |              |
| <40                                  | 0.42       | (0.40, 0.45) | 0.11        | (0.09, 0.13)   | 0.07   | (0.05, 0.09)   | 0.53         | (0.40, 0.72) | 0.47                   | (0.40, 0.54) | 0.51                 | (0.40, 0.66) |
| 40-49                                | 0.51       | (0.48, 0.55) | 0.21        | (0.18, 0.25)   | 0.14   | (0.10, 0.18)   | 0.66         | (0.49, 0.89) | 0.60                   | (0.52, 0.70) | 0.58                 | (0.45, 0.75) |
| 50-59                                | 0.64       | (0.60, 0.68) | 0.39        | (0.33, 0.46)   | 0.33   | (0.27, 0.41)   | 0.63         | (0.47, 0.85) | 0.74                   | (0.64, 0.85) | 0.69                 | (0.54, 0.89) |
| 60-69                                | 0.77       | (0.72, 0.82) | 0.69        | (0.58, 0.82)   | 0.76   | (0.61, 0.95)   | 0.74         | (0.54, 1.02) | 0.78                   | (0.66, 0.91) | 0.71                 | (0.54, 0.93) |
| 70+                                  | 0.86       | (0.79, 0.93) | 0.88        | (0.69, 1.11)   | 1.09   | (0.84, 1.41)   | 0.67         | (0.44, 1.01) | 0.88                   | (0.73, 1.07) | 0.85                 | (0.61, 1.18) |
| <b>P trend</b>                       | <.0001     |              | <.0001      |                | <.0001 |                | 0.0036       |              | <.0001                 |              | <.0001               |              |
| <b>Women</b>                         |            |              |             |                |        |                |              |              |                        |              |                      |              |
| <b>Age quit (vs never smokers)</b>   |            |              |             |                |        |                |              |              |                        |              |                      |              |
| <40                                  | 1.02       | (0.99, 1.05) | 1.99        | (1.65, 2.40)   | 1.84   | (1.44, 2.36)   | 0.92         | (0.82, 1.04) | 0.94                   | (0.86, 1.04) | 1.02                 | (0.91, 1.14) |
| 40-49                                | 1.25       | (1.21, 1.30) | 5.25        | (4.44, 6.21)   | 3.81   | (3.02, 4.79)   | 1.03         | (0.90, 1.18) | 1.26                   | (1.13, 1.39) | 1.07                 | (0.93, 1.22) |
| 50-59                                | 1.58       | (1.53, 1.63) | 8.80        | (7.59, 10.19)  | 10.18  | (8.54, 12.14)  | 1.29         | (1.15, 1.45) | 1.74                   | (1.60, 1.09) | 1.28                 | (1.13, 1.44) |
| 60-69                                | 2.04       | (1.97, 2.12) | 14.97       | (12.85, 17.44) | 16.98  | (14.15, 20.38) | 1.41         | (1.22, 1.64) | 1.78                   | (1.60, 1.99) | 1.61                 | (1.40, 1.86) |
| 70+                                  | 2.16       | (2.03, 2.30) | 18.92       | (15.14, 23.63) | 24.43  | (19.38, 30.80) | 1.36         | (1.06, 1.73) | 1.80                   | (1.50, 2.16) | 1.73                 | (1.38, 2.16) |
| <b>P trend</b>                       | <.0001     |              | <.0001      |                | <.0001 |                | <.0001       |              | <.0001                 |              | <.0001               |              |
| <b>Age quit (vs current smokers)</b> |            |              |             |                |        |                |              |              |                        |              |                      |              |
| <40                                  | 0.39       | (0.37, 0.41) | 0.08        | (0.07, 0.10)   | 0.08   | (0.06, 0.10)   | 0.42         | (0.35, 0.50) | 0.37                   | (0.32, 0.42) | 0.50                 | (0.42, 0.59) |
| 40-49                                | 0.48       | (0.46, 0.50) | 0.22        | (0.19, 0.25)   | 0.16   | (0.13, 0.20)   | 0.47         | (0.39, 0.57) | 0.49                   | (0.43, 0.57) | 0.52                 | (0.43, 0.63) |
| 50-59                                | 0.60       | (0.58, 0.63) | 0.37        | (0.32, 0.42)   | 0.43   | (0.37, 0.50)   | 0.59         | (0.50, 0.70) | 0.68                   | (0.60, 0.78) | 0.62                 | (0.52, 0.75) |
| 60-69                                | 0.78       | (0.74, 0.82) | 0.62        | (0.55, 0.71)   | 0.71   | (0.61, 0.84)   | 0.65         | (0.53, 0.79) | 0.70                   | (0.60, 0.81) | 0.79                 | (0.65, 0.96) |
| 70+                                  | 0.82       | (0.77, 0.88) | 0.79        | (0.64, 0.97)   | 1.03   | (0.82, 1.28)   | 0.62         | (0.47, 0.82) | 0.71                   | (0.58, 0.87) | 0.84                 | (0.65, 1.10) |
| <b>P trend</b>                       | <.0001     |              | <.0001      |                | <.0001 |                | <.0001       |              | <.0001                 |              | <.0001               |              |

\* Based on multivariable models of pooled data adjusting for exact age, race, education, and cohort.

† Former smokers who quit  $\geq 2$  years prior to survey date

‡ For men this included CPS-II Nutrition Cohort and HPFS; for women this included CPS-II Nutrition Cohort, NHS, and WHI.

**Table S7. Relative risks\* of mortality in former† smokers compared to both never and current smokers by age at cessation: men and women in the CPS-II Mortality Cohort**

|                                      | All Causes |              | Lung Cancer |                | COPD   |                | Total Stroke |              | Ischemic Heart Disease |              | Other Heart Diseases |              |
|--------------------------------------|------------|--------------|-------------|----------------|--------|----------------|--------------|--------------|------------------------|--------------|----------------------|--------------|
|                                      | RR         | (95% CI)     | RR          | (95% CI)       | RR     | (95% CI)       | RR           | (95% CI)     | RR                     | (95% CI)     | RR                   | (95% CI)     |
| <b>Men</b>                           |            |              |             |                |        |                |              |              |                        |              |                      |              |
| <b>Age quit (vs never smokers)</b>   |            |              |             |                |        |                |              |              |                        |              |                      |              |
| <40                                  | 0.95       | (0.90, 0.99) | 1.73        | (1.29, 2.31)   | 1.49   | (1.02, 2.19)   | 0.68         | (0.55, 0.86) | 0.91                   | (0.84, 0.99) | 0.84                 | (0.73, 0.98) |
| 40-49                                | 1.21       | (1.16, 1.26) | 4.50        | (3.60, 5.61)   | 2.86   | (2.13, 3.84)   | 0.95         | (0.79, 1.14) | 1.18                   | (1.10, 1.26) | 1.03                 | (0.90, 1.17) |
| 50-59                                | 1.63       | (1.57, 1.69) | 9.78        | (8.01, 11.96)  | 7.91   | (6.23, 10.04)  | 1.15         | (0.97, 1.36) | 1.43                   | (1.34, 1.53) | 1.24                 | (1.09, 1.40) |
| 60-69                                | 1.91       | (1.83, 2.00) | 16.84       | (13.71, 20.69) | 13.42  | (10.59, 17.02) | 1.43         | (1.20, 1.70) | 1.56                   | (1.44, 1.69) | 1.73                 | (1.52, 1.98) |
| 70+                                  | 2.08       | (1.92, 2.25) | 21.80       | (16.16, 29.42) | 20.44  | (15.14, 27.59) | 1.18         | (0.85, 1.64) | 1.76                   | (1.52, 2.04) | 1.48                 | (1.14, 1.92) |
| <b>P trend</b>                       | <.0001     |              | <.0001      |                | <.0001 |                | <.0001       |              | <.0001                 |              | <.0001               |              |
| <b>Age quit (vs current smokers)</b> |            |              |             |                |        |                |              |              |                        |              |                      |              |
| <40                                  | 0.41       | (0.40, 0.43) | 0.08        | (0.06, 0.10)   | 0.16   | (0.12, 0.23)   | 0.35         | (0.28, 0.44) | 0.52                   | (0.48, 0.56) | 0.46                 | (0.39, 0.53) |
| 40-49                                | 0.53       | (0.51, 0.55) | 0.20        | (0.17, 0.23)   | 0.31   | (0.24, 0.39)   | 0.49         | (0.41, 0.59) | 0.67                   | (0.63, 0.72) | 0.55                 | (0.48, 0.63) |
| 50-59                                | 0.71       | (0.69, 0.74) | 0.43        | (0.38, 0.48)   | 0.85   | (0.73, 1.00)   | 0.59         | (0.50, 0.70) | 0.82                   | (0.76, 0.88) | 0.67                 | (0.59, 0.76) |
| 60-69                                | 0.83       | (0.80, 0.87) | 0.74        | (0.65, 0.83)   | 1.45   | (1.23, 1.70)   | 0.73         | (0.61, 0.88) | 0.89                   | (0.82, 0.97) | 0.93                 | (0.81, 1.07) |
| 70+                                  | 0.91       | (0.84, 0.98) | 0.95        | (0.74, 1.22)   | 2.20   | (1.71, 2.83)   | 0.60         | (0.43, 0.85) | 1.00                   | (0.86, 1.17) | 0.80                 | (0.61, 1.04) |
| <b>P trend</b>                       | <.0001     |              | <.0001      |                | <.0001 |                | <.0001       |              | <.0001                 |              | <.0001               |              |
| <b>Women</b>                         |            |              |             |                |        |                |              |              |                        |              |                      |              |
| <b>Age quit (vs never smokers)</b>   |            |              |             |                |        |                |              |              |                        |              |                      |              |
| <40                                  | 1.01       | (0.95, 1.07) | 1.18        | (0.84, 1.66)   | 1.60   | (0.99, 2.57)   | 0.97         | (0.75, 1.25) | 0.83                   | (0.71, 0.97) | 0.77                 | (0.61, 0.97) |
| 40-49                                | 1.20       | (1.13, 1.27) | 3.45        | (2.74, 4.36)   | 3.95   | (2.82, 5.52)   | 0.88         | (0.67, 1.16) | 1.09                   | (0.94, 1.25) | 1.15                 | (0.94, 1.40) |
| 50-59                                | 1.45       | (1.37, 1.52) | 4.60        | (3.71, 5.69)   | 5.32   | (3.99, 7.09)   | 1.42         | (1.15, 1.74) | 1.43                   | (1.27, 1.61) | 1.34                 | (1.12, 1.60) |
| 60-69                                | 1.72       | (1.62, 1.83) | 8.28        | (6.63, 10.35)  | 13.18  | (10.38, 16.73) | 1.31         | (1.04, 1.65) | 1.61                   | (1.43, 1.82) | 1.56                 | (1.29, 1.89) |
| 70+                                  | 1.62       | (1.46, 1.80) | 9.85        | (6.44, 15.07)  | 13.02  | (8.89, 19.09)  | 1.15         | (0.80, 1.65) | 1.55                   | (1.28, 1.89) | 1.42                 | (1.05, 1.92) |
| <b>P trend</b>                       | <.0001     |              | <.0001      |                | <.0001 |                | 0.0312       |              | <.0001                 |              | <.0001               |              |
| <b>Age quit (vs current smokers)</b> |            |              |             |                |        |                |              |              |                        |              |                      |              |
| <40                                  | 0.49       | (0.46, 0.52) | 0.10        | (0.07, 0.13)   | 0.17   | (0.11, 0.27)   | 0.44         | (0.34, 0.58) | 0.42                   | (0.35, 0.49) | 0.41                 | (0.32, 0.52) |
| 40-49                                | 0.58       | (0.55, 0.62) | 0.28        | (0.23, 0.35)   | 0.41   | (0.30, 0.57)   | 0.40         | (0.30, 0.53) | 0.54                   | (0.47, 0.63) | 0.61                 | (0.49, 0.75) |
| 50-59                                | 0.70       | (0.66, 0.74) | 0.37        | (0.31, 0.45)   | 0.56   | (0.43, 0.73)   | 0.64         | (0.52, 0.80) | 0.71                   | (0.63, 0.81) | 0.71                 | (0.58, 0.86) |
| 60-69                                | 0.83       | (0.78, 0.89) | 0.67        | (0.54, 0.83)   | 1.39   | (1.11, 1.74)   | 0.60         | (0.47, 0.76) | 0.80                   | (0.70, 0.92) | 0.82                 | (0.67, 1.01) |
| 70+                                  | 0.78       | (0.70, 0.87) | 0.80        | (0.52, 1.22)   | 1.38   | (0.94, 2.02)   | 0.52         | (0.36, 0.76) | 0.77                   | (0.63, 0.95) | 0.75                 | (0.55, 1.03) |
| <b>P trend</b>                       | <.0001     |              | <.0001      |                | <.0001 |                | 0.0312       |              | <.0001                 |              | <.0001               |              |

\* Multivariable models adjust for race, and education.

† Former smokers who quit  $\geq 2$  years prior to survey date



**Table S8. Relative risks\* of mortality in former† smokers compared to both never and current smokers by age at cessation: men and women in the CPS-I.**

|                                      | All Causes |              | Lung Cancer |               | COPD   |               | Total Stroke |              | Ischemic Heart Disease |              | Other Heart Diseases |              |
|--------------------------------------|------------|--------------|-------------|---------------|--------|---------------|--------------|--------------|------------------------|--------------|----------------------|--------------|
|                                      | RR         | (95% CI)     | RR          | (95% CI)      | RR     | (95% CI)      | RR           | (95% CI)     | RR                     | (95% CI)     | RR                   | (95% CI)     |
| <b>Men</b>                           |            |              |             |               |        |               |              |              |                        |              |                      |              |
| <b>Age quit (vs never smokers)</b>   |            |              |             |               |        |               |              |              |                        |              |                      |              |
| <40                                  | 0.94       | (0.82, 1.08) | -           | -             | 1.00   | (0.24, 4.11)  | 1.21         | (0.75, 1.95) | 0.82                   | (0.66, 1.02) | 1.36                 | (0.84, 2.20) |
| 40-49                                | 1.10       | (1.02, 1.18) | 1.53        | (0.86, 2.71)  | 1.82   | (1.03, 3.23)  | 0.91         | (0.69, 1.19) | 1.16                   | (1.04, 1.29) | 1.31                 | (0.99, 1.73) |
| 50-59                                | 1.36       | (1.28, 1.45) | 4.26        | (2.92, 6.22)  | 6.35   | (4.56, 8.84)  | 0.96         | (0.77, 1.18) | 1.38                   | (1.26, 1.51) | 1.13                 | (0.89, 1.45) |
| 60-69                                | 1.46       | (1.35, 1.57) | 8.06        | (5.29, 12.26) | 9.39   | (6.58, 13.40) | 0.98         | (0.77, 1.26) | 1.37                   | (1.21, 1.55) | 1.19                 | (0.88, 1.61) |
| 70+                                  | 1.47       | (1.26, 1.72) | 6.18        | (1.91, 19.99) | 10.51  | (5.11, 21.63) | 0.56         | (0.32, 0.99) | 1.59                   | (1.25, 2.01) | 2.33                 | (1.56, 3.48) |
| <b>P trend</b>                       | <.0001     |              | <.0001      |               | <.0001 |               | 0.5055       |              | <.0001                 |              | 0.0098               |              |
| <b>Age quit (vs current smokers)</b> |            |              |             |               |        |               |              |              |                        |              |                      |              |
| <40                                  | 0.54       | (0.47, 0.62) | -           | -             | 0.19   | (0.05, 0.78)  | 0.87         | (0.54, 1.40) | 0.49                   | (0.40, 0.61) | 0.91                 | (0.57, 1.47) |
| 40-49                                | 0.63       | (0.58, 0.68) | 0.13        | (0.08, 0.22)  | 0.35   | (0.20, 0.60)  | 0.66         | (0.50, 0.86) | 0.69                   | (0.62, 0.77) | 0.88                 | (0.67, 1.15) |
| 50-59                                | 0.78       | (0.74, 0.83) | 0.36        | (0.26, 0.49)  | 1.22   | (0.93, 1.60)  | 0.69         | (0.56, 0.86) | 0.82                   | (0.75, 0.90) | 0.76                 | (0.60, 0.97) |
| 60-69                                | 0.84       | (0.77, 0.90) | 0.68        | (0.47, 0.98)  | 1.81   | (1.32, 2.47)  | 0.71         | (0.55, 0.91) | 0.82                   | (0.72, 0.92) | 0.80                 | (0.59, 1.09) |
| 70+                                  | 0.85       | (0.73, 0.99) | 0.52        | (0.16, 1.66)  | 2.02   | (0.99, 4.11)  | 0.40         | (0.23, 0.72) | 0.95                   | (0.75, 1.20) | 1.57                 | (1.04, 2.37) |
| <b>P trend</b>                       | <.0001     |              | <.0001      |               | <.0001 |               | 0.5055       |              | <.0001                 |              | 0.0098               |              |
| <b>Women</b>                         |            |              |             |               |        |               |              |              |                        |              |                      |              |
| <b>Age quit (vs never smokers)</b>   |            |              |             |               |        |               |              |              |                        |              |                      |              |
| <40                                  | 1.25       | (0.97, 1.62) | 1.35        | (0.19, 9.77)  | 2.76   | (0.38, 20.13) | 1.74         | (0.77, 3.90) | 2.12                   | (1.33, 3.39) | 0.90                 | (0.29, 2.80) |
| 40-49                                | 1.26       | (1.06, 1.49) | -           | -             | 1.33   | (0.18, 9.58)  | 1.17         | (0.64, 2.11) | 0.79                   | (0.51, 1.23) | 2.11                 | (1.32, 3.37) |
| 50-59                                | 1.31       | (1.14, 1.49) | 1.47        | (0.47, 4.61)  | 2.55   | (0.81, 8.04)  | 1.58         | (1.10, 2.29) | 1.42                   | (1.12, 1.80) | 1.64                 | (1.09, 2.45) |
| 60-69                                | 1.39       | (1.19, 1.62) | 1.14        | (0.16, 8.18)  | 2.40   | (0.59, 9.76)  | 1.45         | (0.99, 2.14) | 1.60                   | (1.26, 2.05) | 1.32                 | (0.82, 2.14) |
| 70+                                  | 1.45       | (1.15, 1.84) | 4.00        | (0.55, 29.02) | 3.73   | (0.51, 27.02) | 1.60         | (0.96, 2.66) | 1.51                   | (1.02, 2.24) | 0.49                 | (0.16, 1.54) |
| <b>P trend</b>                       | 0.1074     |              | 0.4649      |               | 0.7153 |               | 0.4722       |              | 0.0197                 |              | 0.6075               |              |
| <b>Age quit (vs current smokers)</b> |            |              |             |               |        |               |              |              |                        |              |                      |              |
| <40                                  | 0.93       | (0.72, 1.21) | 0.50        | (0.07, 3.60)  | 0.70   | (0.10, 5.09)  | 1.15         | (0.51, 2.58) | 1.36                   | (0.85, 2.18) | 0.75                 | (0.24, 2.34) |
| 40-49                                | 0.93       | (0.79, 1.11) | -           | -             | 0.34   | (0.05, 2.43)  | 0.77         | (0.42, 1.41) | 0.51                   | (0.33, 0.79) | 1.76                 | (1.09, 2.84) |
| 50-59                                | 0.97       | (0.85, 1.11) | 0.54        | (0.17, 1.72)  | 0.65   | (0.20, 2.06)  | 1.05         | (0.72, 1.53) | 0.91                   | (0.71, 1.16) | 1.36                 | (0.90, 2.08) |
| 60-69                                | 1.03       | (0.88, 1.21) | 0.42        | (0.06, 3.05)  | 0.61   | (0.15, 2.52)  | 0.96         | (0.65, 1.43) | 1.03                   | (0.80, 1.32) | 1.10                 | (0.67, 1.81) |
| 70+                                  | 1.08       | (0.85, 1.37) | 1.47        | (0.20, 10.85) | 0.95   | (0.13, 6.98)  | 1.06         | (0.63, 1.78) | 0.97                   | (0.65, 1.44) | 0.41                 | (0.13, 1.29) |
| <b>P trend</b>                       | 0.1074     |              | 0.4649      |               | 0.7153 |               | 0.4722       |              | 0.0197                 |              | 0.6075               |              |

\* Multivariable models adjust for race, and education.

† Former smokers who quit  $\geq 2$  years prior to survey date

**Table S9. Relative risks\* of mortality in former smokers compared to both never and current smokers by years since cessation: men in the contemporary cohorts†.**

|                                                  | All Causes |              | Lung Cancer |                | COPD   |                | Total Stroke |              | Ischemic Heart Disease |              | Other Heart Diseases |              |
|--------------------------------------------------|------------|--------------|-------------|----------------|--------|----------------|--------------|--------------|------------------------|--------------|----------------------|--------------|
|                                                  | RR         | (95% CI)     | RR          | (95% CI)       | RR     | (95% CI)       | RR           | (95% CI)     | RR                     | (95% CI)     | RR                   | (95% CI)     |
| <b>Men</b>                                       |            |              |             |                |        |                |              |              |                        |              |                      |              |
| <b>Years since quitting (vs never smokers)</b>   |            |              |             |                |        |                |              |              |                        |              |                      |              |
| <2                                               | 2.77       | (2.48, 3.10) | 27.37       | (20.23, 37.03) | 38.06  | (25.18, 57.55) | 2.41         | (1.50, 3.87) | 2.59                   | (2.02, 3.31) | 1.78                 | (1.08, 2.93) |
| 2-4                                              | 2.65       | (2.43, 2.89) | 22.17       | (16.91, 29.06) | 43.81  | (31.3, 61.31)  | 2.34         | (1.64, 3.34) | 2.09                   | (1.70, 2.57) | 1.80                 | (1.25, 2.58) |
| 5-9                                              | 2.16       | (2.02, 2.32) | 16.83       | (13.20, 21.46) | 27.50  | (20.11, 37.60) | 0.97         | (0.66, 1.42) | 1.87                   | (1.60, 2.19) | 1.60                 | (1.22, 2.10) |
| 10-19                                            | 1.99       | (1.91, 2.08) | 13.11       | (10.70, 16.05) | 19.49  | (14.78, 25.70) | 1.30         | (1.07, 1.58) | 1.88                   | (1.72, 2.07) | 1.81                 | (1.55, 2.12) |
| 20-29                                            | 1.40       | (1.35, 1.46) | 5.94        | (4.83, 7.29)   | 7.43   | (5.59, 9.87)   | 1.19         | (1.03, 1.39) | 1.40                   | (1.29, 1.51) | 1.22                 | (1.06, 1.40) |
| 30-39                                            | 1.22       | (1.17, 1.27) | 3.88        | (3.09, 4.88)   | 3.62   | (2.63, 4.99)   | 0.96         | (0.80, 1.14) | 1.18                   | (1.07, 1.29) | 1.03                 | (0.89, 1.20) |
| 40-49                                            | 1.10       | (1.04, 1.15) | 2.61        | (1.99, 3.42)   | 2.40   | (1.65, 3.49)   | 1.03         | (0.85, 1.24) | 1.06                   | (0.95, 1.18) | 1.06                 | (0.90, 1.25) |
| 50+                                              | 1.01       | (0.95, 1.07) | 1.36        | (0.89, 2.08)   | 2.22   | (1.42, 3.45)   | 0.86         | (0.67, 1.11) | 0.89                   | (0.77, 1.03) | 1.05                 | (0.86, 1.28) |
| <b><i>P trend</i></b>                            | <.0001     |              | <.0001      |                | <.0001 |                | <.0001       |              | <.0001                 |              | <.0001               |              |
| <b>Years since quitting (vs current smokers)</b> |            |              |             |                |        |                |              |              |                        |              |                      |              |
| <2                                               | 1.07       | (0.95, 1.21) | 1.12        | (0.85, 1.47)   | 1.14   | (0.79, 1.66)   | 1.34         | (0.79, 2.29) | 1.17                   | (0.89, 1.54) | 0.87                 | (0.51, 1.49) |
| 2-4                                              | 1.02       | (0.93, 1.13) | 0.90        | (0.71, 1.15)   | 1.32   | (0.99, 1.75)   | 1.31         | (0.85, 2.01) | 0.95                   | (0.75, 1.20) | 0.88                 | (0.58, 1.34) |
| 5-9                                              | 0.83       | (0.77, 0.91) | 0.69        | (0.56, 0.85)   | 0.83   | (0.64, 1.07)   | 0.54         | (0.34, 0.85) | 0.85                   | (0.70, 1.03) | 0.78                 | (0.55, 1.10) |
| 10-19                                            | 0.77       | (0.72, 0.82) | 0.53        | (0.45, 0.63)   | 0.59   | (0.47, 0.72)   | 0.72         | (0.53, 0.99) | 0.85                   | (0.73, 0.99) | 0.89                 | (0.68, 1.15) |
| 20-29                                            | 0.54       | (0.51, 0.58) | 0.24        | (0.20, 0.29)   | 0.22   | (0.18, 0.28)   | 0.67         | (0.50, 0.89) | 0.63                   | (0.55, 0.73) | 0.60                 | (0.46, 0.77) |
| 30-39                                            | 0.47       | (0.44, 0.5)  | 0.16        | (0.13, 0.19)   | 0.11   | (0.08, 0.14)   | 0.53         | (0.39, 0.73) | 0.53                   | (0.46, 0.62) | 0.51                 | (0.39, 0.66) |
| 40-49                                            | 0.42       | (0.39, 0.45) | 0.11        | (0.08, 0.14)   | 0.07   | (0.05, 0.10)   | 0.57         | (0.42, 0.79) | 0.48                   | (0.41, 0.57) | 0.52                 | (0.40, 0.68) |
| 50+                                              | 0.39       | (0.36, 0.42) | 0.06        | (0.04, 0.08)   | 0.07   | (0.04, 0.10)   | 0.48         | (0.34, 0.69) | 0.40                   | (0.34, 0.49) | 0.51                 | (0.38, 0.69) |
| <b><i>P trend</i></b>                            | <.0001     |              | <.0001      |                | <.0001 |                | <.0001       |              | <.0001                 |              | <.0001               |              |

\* Based on multivariable models of pooled data adjusting for exact age, race, education, and cohort.

†CPS-II Nutrition Cohort and HPFS.

**Table S10. Relative risks\* of mortality in former smokers compared to both never and current smokers by years since cessation: women in the contemporary cohorts†.**

|                                                  | All Causes |              | Lung Cancer |                | COPD   |                | Total Stroke |              | Ischemic Heart Disease |              | Other Heart Diseases |              |
|--------------------------------------------------|------------|--------------|-------------|----------------|--------|----------------|--------------|--------------|------------------------|--------------|----------------------|--------------|
|                                                  | RR         | (95% CI)     | RR          | (95% CI)       | RR     | (95% CI)       | RR           | (95% CI)     | RR                     | (95% CI)     | RR                   | (95% CI)     |
| <b>Women</b>                                     |            |              |             |                |        |                |              |              |                        |              |                      |              |
| <b>Years since quitting (vs never smokers)</b>   |            |              |             |                |        |                |              |              |                        |              |                      |              |
| <2                                               | 2.34       | (2.19, 2.51) | 25.42       | (20.91, 30.92) | 19.40  | (14.77, 25.48) | 1.73         | (1.31, 2.28) | 2.06                   | (1.68, 2.52) | 1.56                 | (1.17, 2.08) |
| 2-4                                              | 2.02       | (1.90, 2.13) | 15.03       | (12.34, 18.31) | 22.11  | (17.68, 27.64) | 1.45         | (1.14, 1.84) | 1.66                   | (1.38, 1.98) | 1.52                 | (1.21, 1.92) |
| 5-9                                              | 2.25       | (2.13, 2.36) | 15.97       | (13.40, 19.03) | 21.72  | (17.48, 26.98) | 1.79         | (1.45, 2.21) | 2.17                   | (1.86, 2.54) | 1.65                 | (1.33, 2.06) |
| 10-19                                            | 1.78       | (1.72, 1.83) | 10.84       | (9.39, 12.51)  | 13.76  | (11.57, 16.36) | 1.32         | (1.16, 1.49) | 1.87                   | (1.71, 2.04) | 1.58                 | (1.41, 1.78) |
| 20-29                                            | 1.31       | (1.27, 1.36) | 5.36        | (4.53, 6.34)   | 5.07   | (4.10, 6.27)   | 1.03         | (0.90, 1.18) | 1.34                   | (1.21, 1.47) | 1.08                 | (0.94, 1.23) |
| 30-39                                            | 1.10       | (1.06, 1.14) | 2.87        | (2.36, 3.50)   | 2.93   | (2.28, 3.77)   | 0.96         | (0.83, 1.10) | 1.07                   | (0.96, 1.19) | 0.99                 | (0.86, 1.14) |
| 40-49                                            | 1.03       | (0.98, 1.07) | 1.82        | (1.38, 2.40)   | 2.07   | (1.49, 2.87)   | 1.03         | (0.88, 1.21) | 0.98                   | (0.86, 1.12) | 1.07                 | (0.91, 1.25) |
| 50+                                              | 1.00       | (0.94, 1.07) | 1.85        | (1.22, 2.80)   | 1.43   | (0.85, 2.43)   | 0.98         | (0.79, 1.22) | 1.01                   | (0.84, 1.21) | 1.02                 | (0.82, 1.27) |
| <b><i>P trend</i></b>                            | <.0001     |              | <.0001      |                | <.0001 |                | <.0001       |              | <.0001                 |              | <.0001               |              |
| <b>Years since quitting (vs current smokers)</b> |            |              |             |                |        |                |              |              |                        |              |                      |              |
| <2                                               | 0.87       | (0.81, 0.94) | 0.98        | (0.82, 1.17)   | 0.73   | (0.56, 0.95)   | 0.78         | (0.58, 1.06) | 0.79                   | (0.63, 0.98) | 0.75                 | (0.54, 1.03) |
| 2-4                                              | 0.75       | (0.70, 0.80) | 0.58        | (0.49, 0.70)   | 0.83   | (0.68, 1.03)   | 0.65         | (0.50, 0.86) | 0.63                   | (0.52, 0.78) | 0.73                 | (0.56, 0.96) |
| 5-9                                              | 0.84       | (0.79, 0.89) | 0.62        | (0.53, 0.72)   | 0.82   | (0.67, 1.00)   | 0.81         | (0.63, 1.03) | 0.83                   | (0.69, 1.00) | 0.79                 | (0.61, 1.02) |
| 10-19                                            | 0.66       | (0.63, 0.69) | 0.42        | (0.37, 0.47)   | 0.52   | (0.45, 0.60)   | 0.59         | (0.50, 0.71) | 0.72                   | (0.63, 0.81) | 0.76                 | (0.63, 0.91) |
| 20-29                                            | 0.49       | (0.47, 0.51) | 0.21        | (0.18, 0.24)   | 0.19   | (0.16, 0.23)   | 0.47         | (0.39, 0.56) | 0.51                   | (0.45, 0.59) | 0.52                 | (0.43, 0.62) |
| 30-39                                            | 0.41       | (0.39, 0.43) | 0.11        | (0.09, 0.13)   | 0.11   | (0.09, 0.14)   | 0.43         | (0.36, 0.52) | 0.41                   | (0.35, 0.47) | 0.47                 | (0.39, 0.57) |
| 40-49                                            | 0.38       | (0.36, 0.40) | 0.07        | (0.05, 0.09)   | 0.08   | (0.06, 0.11)   | 0.47         | (0.38, 0.57) | 0.38                   | (0.32, 0.44) | 0.51                 | (0.41, 0.63) |
| 50+                                              | 0.37       | (0.35, 0.40) | 0.07        | (0.05, 0.11)   | 0.05   | (0.03, 0.09)   | 0.44         | (0.34, 0.57) | 0.39                   | (0.31, 0.48) | 0.49                 | (0.38, 0.64) |
| <b><i>P trend</i></b>                            | <.0001     |              | <.0001      |                | <.0001 |                | <.0001       |              | <.0001                 |              | <.0001               |              |

\* Based on multivariable models of pooled data adjusting for exact age, race, education, and cohort.

† CPS-II Nutrition Cohort, NHS, and WHI.

**Table S11. Relative risks\* of mortality in former smokers compared to both never and current smokers by years since cessation: men in the CPS-II Mortality Cohort.**

|                                                  | All Causes |              | Lung Cancer |                | COPD    |                | Total Stroke |              | Ischemic Heart Disease |              | Other Heart Diseases |              |
|--------------------------------------------------|------------|--------------|-------------|----------------|---------|----------------|--------------|--------------|------------------------|--------------|----------------------|--------------|
|                                                  | RR         | (95% CI)     | RR          | (95% CI)       | RR      | (95% CI)       | RR           | (95% CI)     | RR                     | (95% CI)     | RR                   | (95% CI)     |
| <b>Men</b>                                       |            |              |             |                |         |                |              |              |                        |              |                      |              |
| <b>Years since quitting (vs never smokers)</b>   |            |              |             |                |         |                |              |              |                        |              |                      |              |
| <2                                               | 2.53       | (2.37, 2.69) | 31.32       | (25.23, 38.88) | 20.64   | (15.49, 27.51) | 1.76         | (1.30, 2.38) | 1.77                   | (1.56, 2.00) | 2.13                 | (1.74, 2.62) |
| 2-4                                              | 2.35       | (2.23, 2.48) | 21.54       | (17.39, 26.68) | 18.70   | (14.35, 24.38) | 1.25         | (0.94, 1.66) | 1.97                   | (1.79, 2.17) | 1.82                 | (1.52, 2.18) |
| 5-9                                              | 1.90       | (1.81, 1.99) | 12.69       | (10.23, 15.74) | 15.07   | (11.73, 19.35) | 1.35         | (1.08, 1.68) | 1.66                   | (1.53, 1.81) | 1.55                 | (1.33, 1.81) |
| 10-19                                            | 1.49       | (1.44, 1.55) | 8.04        | (6.58, 9.83)   | 8.38    | (6.62, 10.61)  | 1.23         | (1.05, 1.43) | 1.29                   | (1.21, 1.38) | 1.20                 | (1.06, 1.35) |
| 20-29                                            | 1.17       | (1.12, 1.22) | 3.90        | (3.07, 4.95)   | 3.53    | (2.65, 4.71)   | 0.99         | (0.82, 1.19) | 1.10                   | (1.02, 1.19) | 1.03                 | (0.90, 1.18) |
| 30-39                                            | 0.98       | (0.92, 1.03) | 1.96        | (1.39, 2.77)   | 1.53    | (1.00, 2.35)   | 0.70         | (0.54, 0.89) | 0.93                   | (0.84, 1.02) | 0.88                 | (0.74, 1.05) |
| 40-49                                            | 1.06       | (0.97, 1.16) | 1.48        | (0.78, 2.82)   | 1.19    | (0.58, 2.45)   | 0.90         | (0.64, 1.27) | 1.17                   | (1.01, 1.36) | 1.13                 | (0.88, 1.46) |
| 50+                                              | 1.00       | (0.87, 1.16) | 1.86        | (0.69, 5.06)   | 1.43    | (0.52, 3.90)   | 0.77         | (0.45, 1.31) | 0.85                   | (0.64, 1.11) | 0.95                 | (0.62, 1.44) |
| <b><i>P trend</i></b>                            | <0.0001    |              | <0.0001     |                | <0.0001 |                | <0.0001      |              | <0.0001                |              | <0.0001              |              |
| <b>Years since quitting (vs current smokers)</b> |            |              |             |                |         |                |              |              |                        |              |                      |              |
| <2                                               | 1.07       | (1.01, 1.14) | 1.28        | (1.12, 1.46)   | 1.95    | (1.57, 2.44)   | 0.88         | (0.65, 1.19) | 0.98                   | (0.87, 1.11) | 1.12                 | (0.92, 1.38) |
| 2-4                                              | 0.99       | (0.94, 1.05) | 0.88        | (0.77, 1.00)   | 1.77    | (1.46, 2.14)   | 0.63         | (0.47, 0.83) | 1.09                   | (0.99, 1.21) | 0.96                 | (0.80, 1.15) |
| 5-9                                              | 0.80       | (0.77, 0.84) | 0.52        | (0.45, 0.59)   | 1.43    | (1.20, 1.69)   | 0.68         | (0.54, 0.84) | 0.92                   | (0.85, 1.01) | 0.82                 | (0.70, 0.95) |
| 10-19                                            | 0.63       | (0.61, 0.65) | 0.33        | (0.30, 0.37)   | 0.79    | (0.68, 0.92)   | 0.61         | (0.52, 0.72) | 0.72                   | (0.67, 0.77) | 0.63                 | (0.56, 0.71) |
| 20-29                                            | 0.49       | (0.47, 0.52) | 0.16        | (0.13, 0.19)   | 0.33    | (0.27, 0.42)   | 0.50         | (0.41, 0.60) | 0.61                   | (0.57, 0.66) | 0.54                 | (0.47, 0.62) |
| 30-39                                            | 0.41       | (0.39, 0.44) | 0.08        | (0.06, 0.11)   | 0.15    | (0.10, 0.21)   | 0.35         | (0.27, 0.45) | 0.51                   | (0.47, 0.57) | 0.46                 | (0.39, 0.56) |
| 40-49                                            | 0.45       | (0.41, 0.49) | 0.06        | (0.03, 0.11)   | 0.11    | (0.06, 0.23)   | 0.45         | (0.32, 0.64) | 0.65                   | (0.56, 0.76) | 0.59                 | (0.46, 0.77) |
| 50+                                              | 0.42       | (0.37, 0.49) | 0.08        | (0.03, 0.20)   | 0.14    | (0.05, 0.36)   | 0.38         | (0.22, 0.66) | 0.47                   | (0.36, 0.62) | 0.50                 | (0.33, 0.76) |
| <b><i>P trend</i></b>                            | <0.0001    |              | <0.0001     |                | <0.0001 |                | <0.0001      |              | <0.0001                |              | <0.0001              |              |

\* Based on multivariable models of pooled data adjusting for exact age, race, education, and cohort.

**Table S12. Relative risks\* of mortality in former smokers compared to both never and current smokers by years since cessation: women in the CPS-II Mortality Cohort.**

|                                                  | All Causes |              | Lung Cancer |                | COPD    |                | Total Stroke |              | Ischemic Heart Disease |              | Other Heart Diseases |              |
|--------------------------------------------------|------------|--------------|-------------|----------------|---------|----------------|--------------|--------------|------------------------|--------------|----------------------|--------------|
|                                                  | RR         | (95% CI)     | RR          | (95% CI)       | RR      | (95% CI)       | RR           | (95% CI)     | RR                     | (95% CI)     | RR                   | (95% CI)     |
| <b>Women</b>                                     |            |              |             |                |         |                |              |              |                        |              |                      |              |
| <b>Years since quitting (vs never smokers)</b>   |            |              |             |                |         |                |              |              |                        |              |                      |              |
| <2                                               | 2.26       | (2.06, 2.47) | 13.43       | (10.42, 17.31) | 22.60   | (16.47, 31.01) | 1.81         | (1.21, 2.72) | 1.84                   | (1.47, 2.30) | 1.88                 | (1.35, 2.62) |
| 2-4                                              | 2.22       | (2.07, 2.39) | 12.31       | (9.88, 15.34)  | 21.44   | (16.42, 27.99) | 1.46         | (1.03, 2.06) | 1.94                   | (1.63, 2.30) | 2.29                 | (1.81, 2.90) |
| 5-9                                              | 1.58       | (1.48, 1.69) | 6.13        | (4.83, 7.78)   | 8.71    | (6.4, 11.85)   | 1.45         | (1.11, 1.90) | 1.59                   | (1.37, 1.84) | 1.36                 | (1.08, 1.73) |
| 10-19                                            | 1.29       | (1.23, 1.36) | 3.51        | (2.82, 4.36)   | 6.17    | (4.74, 8.02)   | 1.10         | (0.89, 1.37) | 1.23                   | (1.09, 1.38) | 1.25                 | (1.05, 1.48) |
| 20-29                                            | 1.16       | (1.09, 1.24) | 1.92        | (1.39, 2.65)   | 3.12    | (2.12, 4.59)   | 1.04         | (0.81, 1.33) | 1.15                   | (1.01, 1.32) | 1.03                 | (0.83, 1.27) |
| 30-39                                            | 1.06       | (0.98, 1.14) | 1.72        | (1.15, 2.59)   | 2.42    | (1.45, 4.04)   | 1.13         | (0.85, 1.51) | 1.04                   | (0.87, 1.23) | 0.90                 | (0.68, 1.18) |
| 40-49                                            | 0.99       | (0.88, 1.12) | 0.89        | (0.37, 2.16)   | 1.53    | (0.63, 3.73)   | 0.83         | (0.53, 1.31) | 0.98                   | (0.76, 1.25) | 0.80                 | (0.53, 1.20) |
| 50+                                              | 1.18       | (0.95, 1.46) | 2.03        | (0.51, 8.18)   | 3.72    | (1.19, 11.65)  | 1.33         | (0.71, 2.48) | 1.07                   | (0.70, 1.65) | 0.99                 | (0.51, 1.90) |
| <b>P trend</b>                                   | <0.0001    |              | <0.0001     |                | <0.0001 |                | 0.0047       |              | <0.0001                |              | <0.0001              |              |
| <b>Years since quitting (vs current smokers)</b> |            |              |             |                |         |                |              |              |                        |              |                      |              |
| <2                                               | 1.08       | (0.99, 1.19) | 1.05        | (0.83, 1.33)   | 2.15    | (1.60, 2.89)   | 0.83         | (0.55, 1.25) | 0.92                   | (0.73, 1.15) | 1.00                 | (0.71, 1.39) |
| 2-4                                              | 1.07       | (0.99, 1.15) | 0.97        | (0.79, 1.18)   | 2.04    | (1.60, 2.60)   | 0.66         | (0.47, 0.95) | 0.97                   | (0.81, 1.15) | 1.22                 | (0.95, 1.55) |
| 5-9                                              | 0.76       | (0.71, 0.81) | 0.48        | (0.39, 0.60)   | 0.83    | (0.62, 1.11)   | 0.66         | (0.50, 0.88) | 0.79                   | (0.68, 0.92) | 0.72                 | (0.57, 0.92) |
| 10-19                                            | 0.62       | (0.59, 0.65) | 0.28        | (0.23, 0.34)   | 0.59    | (0.46, 0.75)   | 0.50         | (0.40, 0.63) | 0.61                   | (0.54, 0.69) | 0.66                 | (0.55, 0.79) |
| 20-29                                            | 0.56       | (0.52, 0.59) | 0.15        | (0.11, 0.21)   | 0.30    | (0.20, 0.43)   | 0.47         | (0.36, 0.61) | 0.58                   | (0.50, 0.66) | 0.54                 | (0.43, 0.68) |
| 30-39                                            | 0.51       | (0.47, 0.55) | 0.14        | (0.09, 0.20)   | 0.23    | (0.14, 0.38)   | 0.52         | (0.38, 0.69) | 0.52                   | (0.43, 0.62) | 0.48                 | (0.36, 0.63) |
| 40-49                                            | 0.48       | (0.42, 0.54) | 0.07        | (0.03, 0.17)   | 0.15    | (0.06, 0.35)   | 0.38         | (0.24, 0.60) | 0.49                   | (0.38, 0.63) | 0.42                 | (0.28, 0.64) |
| 50+                                              | 0.56       | (0.45, 0.70) | 0.16        | (0.04, 0.64)   | 0.35    | (0.11, 1.11)   | 0.61         | (0.32, 1.14) | 0.54                   | (0.35, 0.83) | 0.52                 | (0.27, 1.01) |
| <b>P trend</b>                                   | <0.0001    |              | <0.0001     |                | <0.0001 |                | 0.0047       |              | <0.0001                |              | <0.0001              |              |

\* Based on multivariable models of pooled data adjusting for exact age, race, education, and cohort.

**Table S13. Relative risks\* of mortality in former smokers compared to both never and current smokers by years since cessation: men and women in CPS-I.**

|                                                  | All Causes |              | Lung Cancer |                | COPD    |               | Total Stroke |              | Ischemic Heart Disease |              | Other Heart Diseases |              |
|--------------------------------------------------|------------|--------------|-------------|----------------|---------|---------------|--------------|--------------|------------------------|--------------|----------------------|--------------|
|                                                  | RR         | (95% CI)     | RR          | (95% CI)       | RR      | (95% CI)      | RR           | (95% CI)     | RR                     | (95% CI)     | RR                   | (95% CI)     |
| <b>Men</b>                                       |            |              |             |                |         |               |              |              |                        |              |                      |              |
| <b>Years since quitting (vs never smokers)</b>   |            |              |             |                |         |               |              |              |                        |              |                      |              |
| <2                                               | 1.79       | (1.65, 1.95) | 14.43       | (10.15, 20.53) | 12.32   | (8.45, 17.96) | 1.01         | (0.72, 1.41) | 1.71                   | (1.50, 1.93) | 1.60                 | (1.15, 2.24) |
| 2-4                                              | 1.64       | (1.52, 1.77) | 8.82        | (6.06, 12.84)  | 13.83   | (9.93, 19.28) | 0.96         | (0.71, 1.29) | 1.60                   | (1.43, 1.79) | 1.51                 | (1.11, 2.04) |
| 5-9                                              | 1.36       | (1.27, 1.46) | 4.52        | (2.98, 6.87)   | 6.26    | (4.28, 9.14)  | 0.98         | (0.76, 1.25) | 1.31                   | (1.18, 1.46) | 1.53                 | (1.18, 1.98) |
| 10-19                                            | 1.27       | (1.18, 1.36) | 1.98        | (1.12, 3.51)   | 3.46    | (2.17, 5.51)  | 0.98         | (0.76, 1.25) | 1.31                   | (1.18, 1.46) | 1.22                 | (0.92, 1.61) |
| 20+                                              | 0.98       | (0.91, 1.06) | 0.28        | (0.07, 1.15)   | 1.79    | (1.00, 3.22)  | 0.84         | (0.66, 1.07) | 0.98                   | (0.87, 1.10) | 1.05                 | (0.79, 1.39) |
| <b>P trend</b>                                   | <0.0001    |              | <0.0001     |                | <0.0001 |               | 0.5705       |              | <0.0001                |              | 0.0231               |              |
| <b>Years since quitting (vs current smokers)</b> |            |              |             |                |         |               |              |              |                        |              |                      |              |
| <2                                               | 1.02       | (0.94, 1.10) | 1.17        | (0.89, 1.54)   | 2.21    | (1.60, 3.05)  | 0.73         | (0.52, 1.02) | 1.01                   | (0.89, 1.14) | 1.06                 | (0.76, 1.47) |
| 2-4                                              | 0.93       | (0.86, 1.00) | 0.72        | (0.53, 0.97)   | 2.48    | (1.90, 3.24)  | 0.69         | (0.52, 0.93) | 0.95                   | (0.84, 1.06) | 0.99                 | (0.74, 1.34) |
| 5-9                                              | 0.77       | (0.72, 0.83) | 0.37        | (0.26, 0.52)   | 1.12    | (0.81, 1.55)  | 0.71         | (0.55, 0.91) | 0.77                   | (0.70, 0.86) | 1.01                 | (0.78, 1.30) |
| 10-19                                            | 0.72       | (0.67, 0.77) | 0.16        | (0.09, 0.27)   | 0.62    | (0.41, 0.95)  | 0.71         | (0.55, 0.90) | 0.78                   | (0.70, 0.86) | 0.80                 | (0.61, 1.06) |
| 20+                                              | 0.56       | (0.52, 0.60) | 0.02        | (0.01, 0.09)   | 0.32    | (0.18, 0.56)  | 0.61         | (0.48, 0.78) | 0.58                   | (0.52, 0.65) | 0.69                 | (0.52, 0.92) |
| <b>P trend</b>                                   | <0.0001    |              | <0.0001     |                | <0.0001 |               | 0.5705       |              | <0.0001                |              | 0.0231               |              |
| <b>Women</b>                                     |            |              |             |                |         |               |              |              |                        |              |                      |              |
| <b>Years since quitting (vs never smokers)</b>   |            |              |             |                |         |               |              |              |                        |              |                      |              |
| <2                                               | 1.37       | (1.18, 1.60) | 2.88        | (1.07, 7.79)   | 7.07    | (3.11, 16.10) | 1.12         | (0.69, 1.83) | 1.45                   | (1.10, 1.91) | 1.34                 | (0.81, 2.23) |
| 2-4                                              | 1.47       | (1.27, 1.70) | 1.37        | (0.34, 5.53)   | 4.41    | (1.63, 11.96) | 1.69         | (1.15, 2.49) | 1.85                   | (1.46, 2.34) | 1.09                 | (0.63, 1.88) |
| 5-9                                              | 1.29       | (1.11, 1.50) | 1.37        | (0.34, 5.52)   | 2.15    | (0.53, 8.71)  | 1.76         | (1.20, 2.57) | 1.39                   | (1.06, 1.83) | 1.42                 | (0.88, 2.29) |
| 10-19                                            | 1.34       | (1.16, 1.55) | 0.65        | (0.09, 4.63)   | 1.03    | (0.14, 7.36)  | 1.40         | (0.93, 2.12) | 1.01                   | (0.74, 1.38) | 1.80                 | (1.19, 2.71) |
| 20+                                              | 1.15       | (0.95, 1.39) | 1.02        | (0.14, 7.32)   | 1.73    | (0.24, 12.42) | 0.98         | (0.54, 1.76) | 1.44                   | (1.03, 1.99) | 1.36                 | (0.77, 2.40) |
| <b>P trend</b>                                   | 0.1468     |              | 0.1688      |                | 0.0244  |               | 0.7897       |              | 0.1845                 |              | 0.2536               |              |
| <b>Years since quitting (vs current smokers)</b> |            |              |             |                |         |               |              |              |                        |              |                      |              |
| <2                                               | 1.02       | (0.87, 1.19) | 1.06        | (0.39, 2.88)   | 1.79    | (0.78, 4.13)  | 0.74         | (0.45, 1.22) | 0.93                   | (0.70, 1.23) | 1.12                 | (0.67, 1.89) |
| 2-4                                              | 1.09       | (0.94, 1.26) | 0.50        | (0.12, 2.04)   | 1.12    | (0.41, 3.07)  | 1.12         | (0.75, 1.66) | 1.18                   | (0.93, 1.51) | 0.91                 | (0.52, 1.59) |
| 5-9                                              | 0.96       | (0.82, 1.12) | 0.50        | (0.12, 2.04)   | 0.54    | (0.13, 2.23)  | 1.16         | (0.79, 1.71) | 0.89                   | (0.68, 1.18) | 1.19                 | (0.73, 1.94) |
| 10-19                                            | 1.00       | (0.86, 1.15) | 0.24        | (0.03, 1.70)   | 0.26    | (0.04, 1.88)  | 0.93         | (0.61, 1.41) | 0.65                   | (0.47, 0.89) | 1.50                 | (0.98, 2.30) |
| 20+                                              | 0.85       | (0.70, 1.04) | 0.38        | (0.05, 2.70)   | 0.44    | (0.06, 3.16)  | 0.64         | (0.35, 1.17) | 0.92                   | (0.66, 1.28) | 1.14                 | (0.64, 2.03) |
| <b>P trend</b>                                   | 0.1468     |              | 0.1688      |                | 0.0244  |               | 0.7897       |              | 0.1845                 |              | 0.2536               |              |

\* Multivariable models adjust for race, education

**Table S14. Pooled interaction models of the relative risk of mortality associated with current and former smoking compared to never smoking by education attainment in women and men in the CPS-II Nutrition Cohort, HPFS, NHS, NIH-AARP, and WHI.**

|                               | High School Education or Less* |                | Some College or Vocational School* |                | College Degree or More |                | <i>P</i> <sub>interaction</sub> |
|-------------------------------|--------------------------------|----------------|------------------------------------|----------------|------------------------|----------------|---------------------------------|
|                               | RR                             | (95% CI)       | RR                                 | (95% CI)       | RR                     | (95% CI)       |                                 |
| <b>Women</b>                  |                                |                |                                    |                |                        |                |                                 |
| <b>All causes</b>             |                                |                |                                    |                |                        |                |                                 |
| Current Smokers               | 2.78                           | (2.64, 2.92)   | 2.77                               | (2.64, 2.90)   | 2.60                   | (2.49, 2.72)   | p= 0.082                        |
| Former Smokers                | 1.56                           | (1.51, 1.62)   | 1.48                               | (1.44, 1.53)   | 1.36                   | (1.33, 1.39)   | p< 0.001                        |
| <b>Lung Cancer</b>            |                                |                |                                    |                |                        |                |                                 |
| Current Smokers               | 27.71                          | (22.55, 34.05) | 23.77                              | (19.71, 28.65) | 20.83                  | (17.79, 24.39) | p= 0.087                        |
| Former Smokers                | 8.87                           | (7.31, 10.76)  | 6.87                               | (5.78, 8.17)   | 5.33                   | (4.63, 6.13)   | p< 0.001                        |
| <b>COPD</b>                   |                                |                |                                    |                |                        |                |                                 |
| Current Smokers               | 23.07                          | (18.21, 29.24) | 24.11                              | (19.1, 30.44)  | 23.78                  | (18.61, 30.39) | p= 0.964                        |
| Former Smokers                | 9.01                           | (7.32, 11.08)  | 8.17                               | (6.65, 10.03)  | 7.10                   | (5.77, 8.74)   | p= 0.281                        |
| <b>Ischemic Heart Disease</b> |                                |                |                                    |                |                        |                |                                 |
| Current Smokers               | 2.97                           | (2.61, 3.39)   | 2.76                               | (2.43, 3.14)   | 2.74                   | (2.39, 3.14)   | p= 0.629                        |
| Former Smokers                | 1.55                           | (1.42, 1.69)   | 1.43                               | (1.32, 1.55)   | 1.35                   | (1.25, 1.46)   | p= 0.082                        |
| <b>Other Heart Diseases</b>   |                                |                |                                    |                |                        |                |                                 |
| Current Smokers               | 1.81                           | (1.48, 2.21)   | 1.92                               | (1.59, 2.33)   | 1.82                   | (1.50, 2.22)   | p= 0.888                        |
| Former Smokers                | 1.36                           | (1.21, 1.52)   | 1.25                               | (1.12, 1.39)   | 1.16                   | (1.05, 1.28)   | p= 0.117                        |
| <b>Total Stroke</b>           |                                |                |                                    |                |                        |                |                                 |
| Current Smokers               | 2.08                           | (1.65, 2.62)   | 2.19                               | (1.79, 2.68)   | 2.09                   | (1.74, 2.50)   | p= 0.927                        |
| Former Smokers                | 1.23                           | (1.07, 1.41)   | 1.22                               | (1.08, 1.37)   | 1.07                   | (0.97, 1.17)   | p= 0.124                        |
| <b>Men</b>                    |                                |                |                                    |                |                        |                |                                 |
| <b>All causes</b>             |                                |                |                                    |                |                        |                |                                 |
| Current Smokers               | 2.70                           | (2.55, 2.85)   | 2.89                               | (2.74, 3.05)   | 2.81                   | (2.68, 2.95)   | p= 0.179                        |
| Former Smokers                | 1.51                           | (1.46, 1.57)   | 1.52                               | (1.46, 1.57)   | 1.42                   | (1.39, 1.46)   | p= 0.002                        |
| <b>Lung Cancer</b>            |                                |                |                                    |                |                        |                |                                 |
| Current Smokers               | 27.27                          | (21.14, 35.17) | 27.10                              | (21.23, 34.58) | 23.56                  | (19.83, 27.98) | p= 0.511                        |
| Former Smokers                | 8.12                           | (6.39, 10.33)  | 7.69                               | (6.12, 9.67)   | 5.87                   | (5.07, 6.80)   | p= 0.029                        |
| <b>COPD</b>                   |                                |                |                                    |                |                        |                |                                 |
| Current Smokers               | 21.62                          | (15.96, 29.28) | 28.58                              | (20.47, 39.90) | 29.60                  | (22.45, 39.03) | p= 0.272                        |
| Former Smokers                | 6.31                           | (4.80, 8.28)   | 7.72                               | (5.68, 10.49)  | 7.43                   | (5.88, 9.38)   | p= 0.566                        |
| <b>Ischemic Heart Disease</b> |                                |                |                                    |                |                        |                |                                 |
| Current Smokers               | 2.23                           | (1.97, 2.53)   | 2.38                               | (2.11, 2.68)   | 2.99                   | (2.68, 3.33)   | p= 0.001                        |
| Former Smokers                | 1.41                           | (1.31, 1.53)   | 1.36                               | (1.26, 1.47)   | 1.45                   | (1.37, 1.53)   | p= 0.434                        |
| <b>Other Heart Diseases</b>   |                                |                |                                    |                |                        |                |                                 |
| Current Smokers               | 1.66                           | (1.32, 2.08)   | 2.42                               | (1.99, 2.94)   | 2.44                   | (2.02, 2.96)   | p= 0.013                        |
| Former Smokers                | 1.22                           | (1.08, 1.39)   | 1.24                               | (1.10, 1.40)   | 1.27                   | (1.16, 1.39)   | p= 0.871                        |
| <b>Total Stroke</b>           |                                |                |                                    |                |                        |                |                                 |
| Current Smokers               | 1.50                           | (1.13, 1.99)   | 2.20                               | (1.68, 2.88)   | 2.00                   | (1.59, 2.53)   | p= 0.118                        |
| Former Smokers                | 1.05                           | (0.90, 1.22)   | 1.32                               | (1.13, 1.55)   | 1.13                   | (1.02, 1.25)   | p= 0.109                        |

\* Does not include the Harvard professional cohorts

‡ Former smokers who quit >2 years prior to survey date

**Table S15. Age-standardized rates per 100,000, and age-adjusted Cox Proportional Hazard Ratios for women of CPS-II Nutrition Cohort using time dependent, baseline only, or smoking status ~ 2-years prior to endpoint.**

|                       | Never Smoker   |                      |                           | Current Smoker |                      |                           | Former Smoker* |                      |                           |
|-----------------------|----------------|----------------------|---------------------------|----------------|----------------------|---------------------------|----------------|----------------------|---------------------------|
|                       | Updated Status | Baseline-only Status | Status 2-years before End | Updated Status | Baseline-only Status | Status 2-years before End | Updated Status | Baseline-only Status | Status 2-years before End |
| <b>Person years</b>   | 420,780        | 421,381              | 420,585                   | 29,052         | 33,360               | 28,201                    | 300,432        | 293,183              | 302,045                   |
| <b>All-Causes</b>     |                |                      |                           |                |                      |                           |                |                      |                           |
| Deaths (n)            | 6,720          | 6,732                | 6,724                     | 742            | 972                  | 859                       | 5,996          | 5,687                | 5,874                     |
| Rate per 100,000      | 1,140.94       | 1,141.14             | 1,141.99                  | 2,296.42       | 2,567.95             | 2,704.31                  | 1,492.63       | 1,450.93             | 1,459.43                  |
| Age-Adj RR            | 1.00           | 1.00                 | 1.00                      | 2.31           | 2.56                 | 2.68                      | 1.37           | 1.33                 | 1.34                      |
| (95% CI)              | -              | -                    | -                         | (2.14, 2.49)   | (2.39, 2.74)         | (2.50, 2.88)              | (1.33, 1.42)   | (1.29, 1.38)         | (1.30, 1.39)              |
| <b>Lung Cancer</b>    |                |                      |                           |                |                      |                           |                |                      |                           |
| Deaths (n)            | 121            | 121                  | 121                       | 163            | 221                  | 202                       | 578            | 523                  | 549                       |
| Rate per 100,000      | 24.54          | 24.50                | 24.55                     | 502.90         | 580.80               | 652.36                    | 147.06         | 137.97               | 140.05                    |
| Age-Adj RR            | 1.00           | 1.00                 | 1.00                      | 23.90          | 27.83                | 30.19                     | 7.00           | 6.52                 | 6.64                      |
| (95% CI)              | -              | -                    | -                         | (18.86, 30.30) | (22.26, 34.80)       | (24.06, 37.88)            | (5.76, 8.52)   | (5.35, 7.94)         | (5.45, 8.08)              |
| <b>COPD</b>           |                |                      |                           |                |                      |                           |                |                      |                           |
| Deaths (n)            | 84             | 84                   | 84                        | 90             | 115                  | 95                        | 437            | 385                  | 419                       |
| Rate per 100,000      | 14.16          | 14.14                | 14.17                     | 276.09         | 306.75               | 292.76                    | 104.75         | 94.16                | 99.38                     |
| Age-Adj RR            | 1.00           | 1.00                 | 1.00                      | 23.27          | 25.00                | 24.65                     | 8.08           | 7.30                 | 7.74                      |
| (95% CI)              | -              | -                    | -                         | (17.24, 31.42) | (18.83, 33.20)       | (18.33, 33.13)            | (6.39, 10.20)  | (5.77, 9.25)         | (6.12, 9.78)              |
| <b>Ischemic Heart</b> |                |                      |                           |                |                      |                           |                |                      |                           |
| Deaths (n)            | 933            | 935                  | 935                       | 90             | 115                  | 101                       | 783            | 751                  | 769                       |
| Rate per 100,000      | 151.78         | 151.87               | 152.13                    | 270.92         | 294.40               | 301.56                    | 182.58         | 179.40               | 179.19                    |
| Age-Adj RR            | 1.00           | 1.00                 | 1.00                      | 2.29           | 2.46                 | 2.57                      | 1.34           | 1.31                 | 1.31                      |
| (95% CI)              | -              | -                    | -                         | (1.84, 2.84)   | (2.03, 2.99)         | (2.09, 3.16)              | (1.22, 1.47)   | (1.19, 1.44)         | (1.19, 1.44)              |
| <b>Other Heart</b>    |                |                      |                           |                |                      |                           |                |                      |                           |
| Deaths (n)            | 627            | 628                  | 627                       | 39             | 50                   | 45                        | 448            | 438                  | 444                       |
| Rate per 100,000      | 99.36          | 99.36                | 99.39                     | 121.77         | 131.15               | 142.79                    | 107.53         | 107.70               | 106.41                    |
| Age-Adj RR            | 1.00           | 1.00                 | 1.00                      | 1.49           | 1.59                 | 1.70                      | 1.13           | 1.13                 | 1.12                      |
| (95% CI)              | -              | -                    | -                         | (1.08, 2.06)   | (1.19, 2.12)         | (1.26, 2.30)              | (1.00, 1.27)   | (1.00, 1.27)         | (0.99, 1.26)              |
| <b>Total Stroke</b>   |                |                      |                           |                |                      |                           |                |                      |                           |
| Deaths (n)            | 568            | 568                  | 568                       | 54             | 57                   | 52                        | 402            | 393                  | 398                       |
| Rate per 100,000      | 86.86          | 86.73                | 86.88                     | 167.82         | 149.55               | 162.00                    | 93.05          | 93.17                | 92.06                     |
| Age-Adj RR            | 1.00           | 1.00                 | 1.00                      | 2.29           | 2.04                 | 2.20                      | 1.13           | 1.13                 | 1.12                      |
| (95% CI)              | -              | -                    | -                         | (1.73, 3.03)   | (1.55, 2.68)         | (1.66, 2.93)              | (1.00, 1.29)   | (1.00, 1.29)         | (0.99, 1.27)              |

\*Former smokers who quit >2 years prior to survey date



**Table S16. Age-standardized rates per 100,000, and age-adjusted Cox Proportional Hazard Ratios for men of CPS-II Nutrition Cohort using time dependent, baseline only, or smoking status ~ 2-years prior to endpoint.**

|                       | Never Smoker   |                      |                           | Current Smoker |                      |                           | Former Smoker* |                      |                           |
|-----------------------|----------------|----------------------|---------------------------|----------------|----------------------|---------------------------|----------------|----------------------|---------------------------|
|                       | Updated Status | Baseline-only Status | Status 2-years before End | Updated Status | Baseline-only Status | Status 2-years before End | Updated Status | Baseline-only Status | Status 2-years before End |
| <b>Person years</b>   | 201,782        | 202,112              | 201,672                   | 20,360         | 23,510               | 19,549                    | 362,920        | 356,998              | 364,307                   |
| <b>All-Causes</b>     |                |                      |                           |                |                      |                           |                |                      |                           |
| Deaths (n)            | 5,203          | 5,220                | 5,206                     | 940            | 1,159                | 1,076                     | 13,368         | 13,026               | 13,252                    |
| Rate per 100,000      | 1,714.64       | 1,717.12             | 1,716.38                  | 3,917.68       | 4,033.57             | 4,548.39                  | 2,453.54       | 2,431.16             | 2,420.57                  |
| Age-Adj RR            | 1.00           | 1.00                 | 1.00                      | 2.61           | 2.72                 | 3.06                      | 1.44           | 1.42                 | 1.42                      |
| (95% CI)              | -              | -                    | -                         | (2.44, 2.80)   | (2.56, 2.91)         | (2.86, 3.27)              | (1.39, 1.48)   | (1.37, 1.46)         | (1.38, 1.47)              |
| <b>Lung Cancer</b>    |                |                      |                           |                |                      |                           |                |                      |                           |
| Deaths (n)            | 83             | 83                   | 83                        | 184            | 237                  | 221                       | 1,111          | 1,044                | 1,087                     |
| Rate per 100,000      | 28.35          | 28.31                | 28.37                     | 779.24         | 833.94               | 945.40                    | 199.57         | 191.53               | 194.90                    |
| Age-Adj RR            | 1.00           | 1.00                 | 1.00                      | 27.17          | 29.85                | 33.43                     | 7.33           | 6.99                 | 7.15                      |
| (95% CI)              | -              | -                    | -                         | (20.93, 35.26) | (23.21, 38.38)       | (25.94, 43.09)            | (5.86, 9.16)   | (5.59, 8.74)         | (5.72, 8.94)              |
| <b>COPD</b>           |                |                      |                           |                |                      |                           |                |                      |                           |
| Deaths (n)            | 55             | 55                   | 55                        | 102            | 136                  | 115                       | 732            | 682                  | 704                       |
| Rate per 100,000      | 15.75          | 15.73                | 15.75                     | 395.66         | 443.61               | 451.34                    | 117.40         | 111.07               | 112.78                    |
| Age-Adj RR            | 1.00           | 1.00                 | 1.00                      | 29.43          | 33.10                | 33.70                     | 7.41           | 7.00                 | 7.12                      |
| (95% CI)              | -              | -                    | -                         | (21.14, 40.95) | (24.14, 45.39)       | (24.38, 46.60)            | (5.63, 9.74)   | (5.32, 9.22)         | (5.41, 9.37)              |
| <b>Ischemic Heart</b> |                |                      |                           |                |                      |                           |                |                      |                           |
| Deaths (n)            | 1,123          | 1,127                | 1,123                     | 185            | 220                  | 206                       | 2,713          | 2,653                | 2,706                     |
| Rate per 100,000      | 366.91         | 367.48               | 367.08                    | 776.71         | 780.99               | 896.31                    | 513.24         | 511.11               | 509.40                    |
| Age-Adj RR            | 1.00           | 1.00                 | 1.00                      | 2.39           | 2.43                 | 2.75                      | 1.35           | 1.34                 | 1.35                      |
| (95% CI)              | -              | -                    | -                         | (2.05, 2.80)   | (2.10, 2.81)         | (2.36, 3.19)              | (1.26, 1.45)   | (1.25, 1.43)         | (1.26, 1.45)              |
| <b>Other Heart</b>    |                |                      |                           |                |                      |                           |                |                      |                           |
| Deaths (n)            | 478            | 480                  | 478                       | 60             | 70                   | 65                        | 1,055          | 1,043                | 1,053                     |
| Rate per 100,000      | 142.77         | 143.16               | 142.80                    | 252.56         | 247.34               | 276.70                    | 185.43         | 186.29               | 184.34                    |
| Age-Adj RR            | 1.00           | 1.00                 | 1.00                      | 2.01           | 1.97                 | 2.23                      | 1.25           | 1.25                 | 1.25                      |
| (95% CI)              | -              | -                    | -                         | (1.54, 2.64)   | (1.53, 2.54)         | (1.71, 2.89)              | (1.12, 1.39)   | (1.12, 1.39)         | (1.12, 1.39)              |
| <b>Total Stroke</b>   |                |                      |                           |                |                      |                           |                |                      |                           |
| Deaths (n)            | 375            | 376                  | 376                       | 36             | 55                   | 48                        | 714            | 698                  | 706                       |
| Rate per 100,000      | 120.56         | 120.66               | 120.89                    | 139.37         | 182.85               | 191.12                    | 115.48         | 114.58               | 113.92                    |
| Age-Adj RR            | 1.00           | 1.00                 | 1.00                      | 1.52           | 1.97                 | 2.07                      | 1.08           | 1.06                 | 1.06                      |
| (95% CI)              | -              | -                    | -                         | (1.07, 2.14)   | (1.48, 2.62)         | (1.53, 2.80)              | (0.95, 1.22)   | (0.94, 1.21)         | (0.93, 1.20)              |

\*Former smokers who quit >2 years prior to survey date
